# Supplementary material for: Hidden colour signals as key drivers in the evolution of anti-predator coloration and defensive behaviours in snakes
Source: Research Square preprint supplement (doi:10.21203/rs.3.rs-6054316/v1), 2025-03-24
Supplement: Supplementary file 1 [file c03f251f7205dc4805fdeda4.docx]

Supplementary Information for the paper:

**Hidden colour signals as key drivers in the evolution of anti-predator coloration and defensive behaviours in snakes**

**Table S1. Frequency of each color strategy among the analyzed 251 species.**

| **Color strategy** | **Cry** | **Hidden** | **Con** | **Polymorphic** | | | |
| --- | --- | --- | --- | --- | --- | --- | --- |
| **Cry/Hidden** | **Cry/Con** | **Hidden/Con** | **Cry/Hidden/Con** |
| Number of species | 87 | 51 | 101 | 3 | 1 | 5 | 3 |


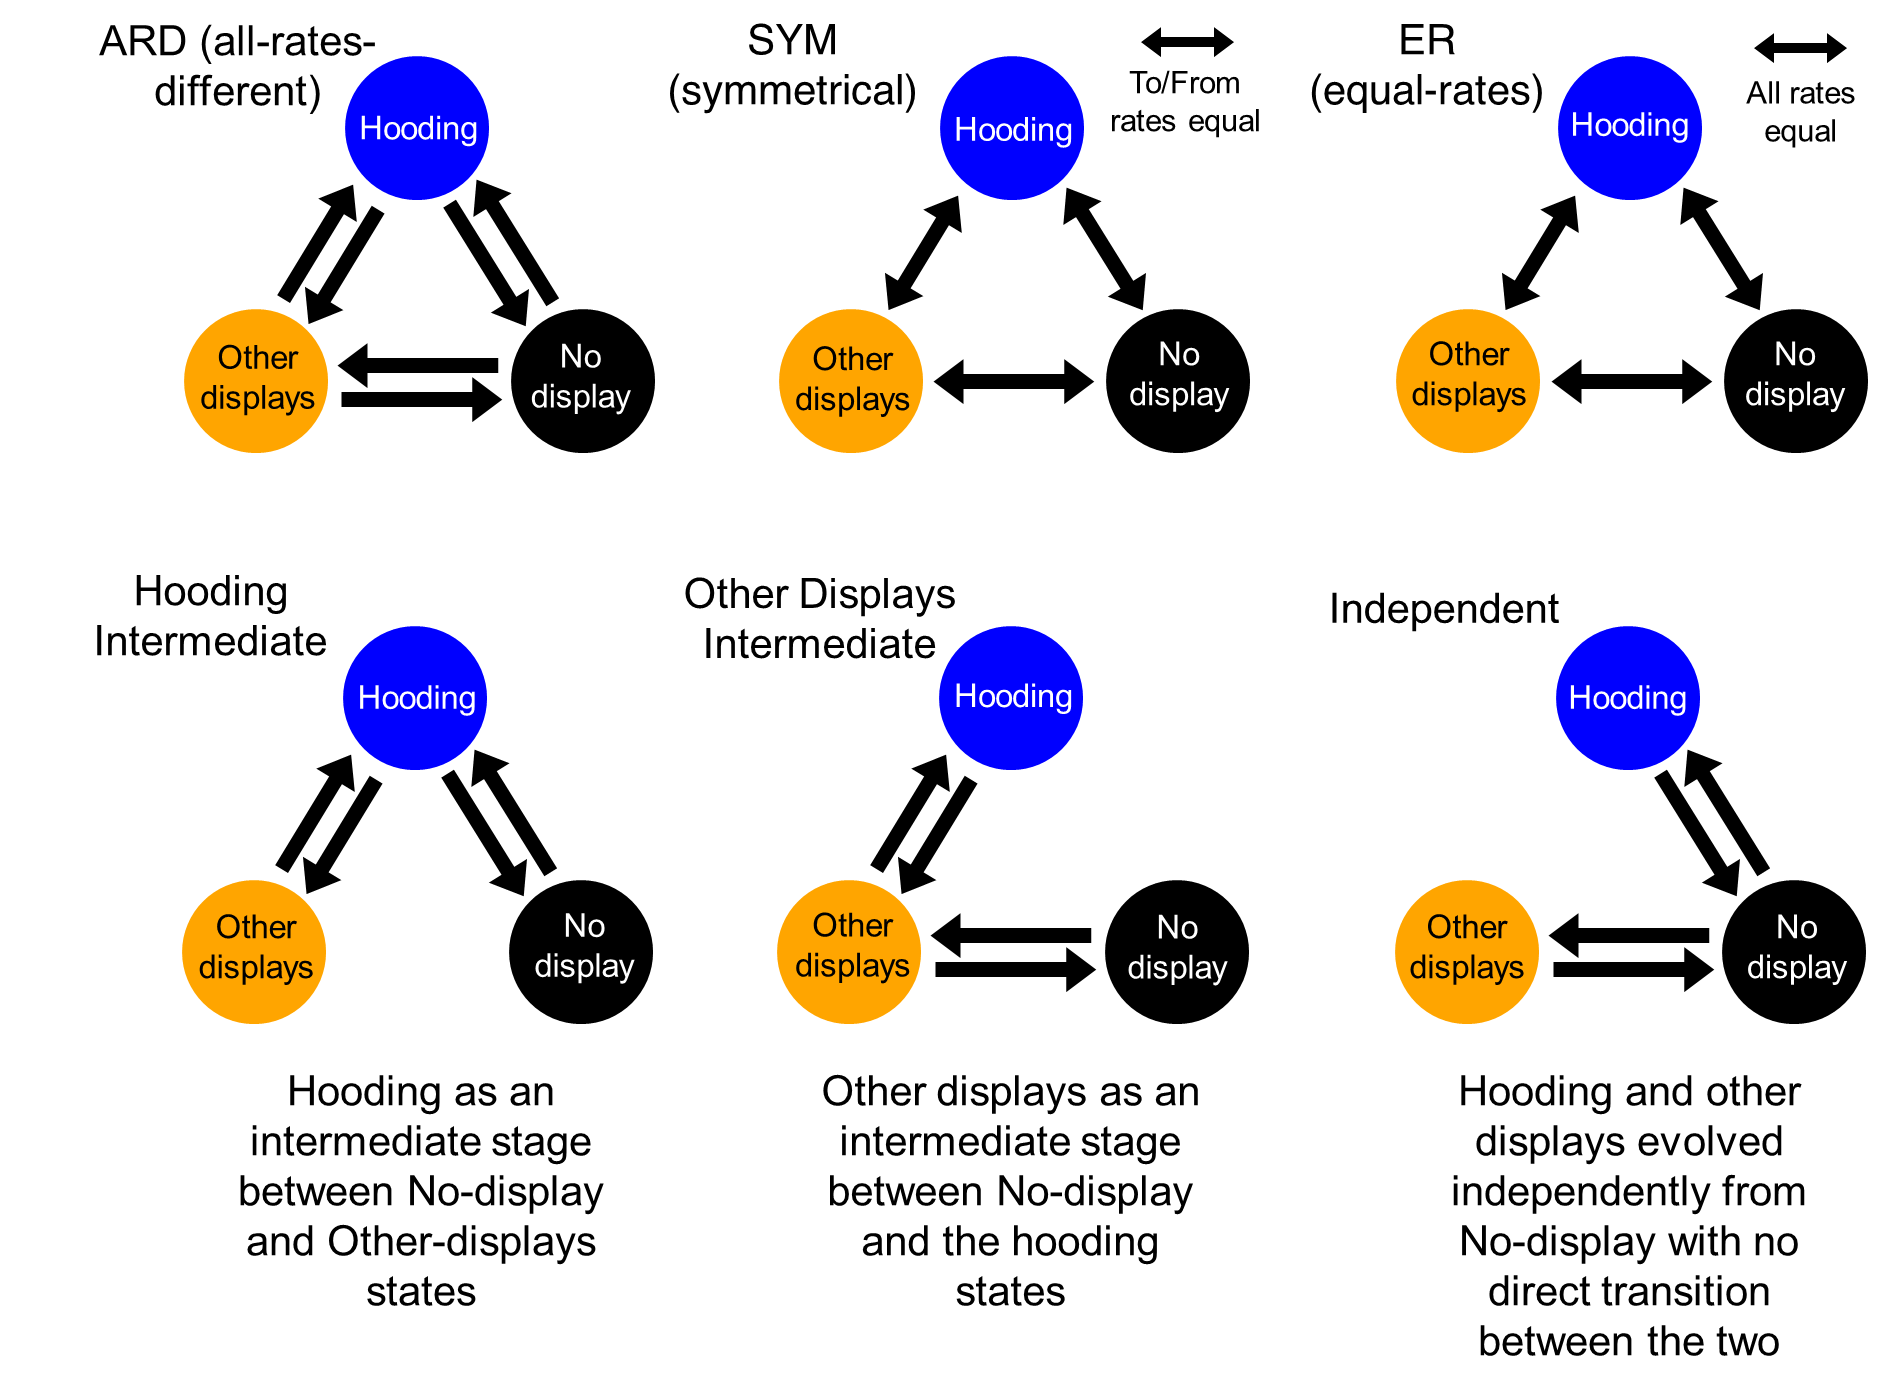


**Figure S1. The models we fitted to examine the transitional patterns among the behavioral traits.**

**Table S2. Full transition matrix of the ER model.** Grey cells are those estimated for polymorphic states that only a few species exist.

| **To**  **From** | **Cry** | **Hidden** | **Con** | **Cry**  **/Hidden** | **Cry**  **/Con** | **Hidden**  **/Con** | **Cry**  **/Hidden**  **/Con** |
| --- | --- | --- | --- | --- | --- | --- | --- |
| **Cry** |  | 0.0019 | 0.0019 | 0.0159 | 0.102 | 0 | 0.301 |
| **Hidden** | 0.0019 |  | 0.0019 | 0.034 | 0 | 0.022 | 0 |
| **Con** | 0.0019 | 0.0019 |  | 0 | 0 | 248.09 | 0 |
| **Cry**  **/Hidden** | 0.496 | 0.715 | 0 |  | 0 | 0 | 0 |
| **Cry**  **/Con** | 8.563 | 0 | 0.237 | 0 |  | 0 | 0 |
| **Hidden**  **/Con** | 0 | 0.313 | 5011.68 | 0 | 0 |  | 0 |
| **Cry**  **/Hidden**  **/Con** | 8.510 | 0.0009 | 0.190 | 0 | 0 | 0 |  |


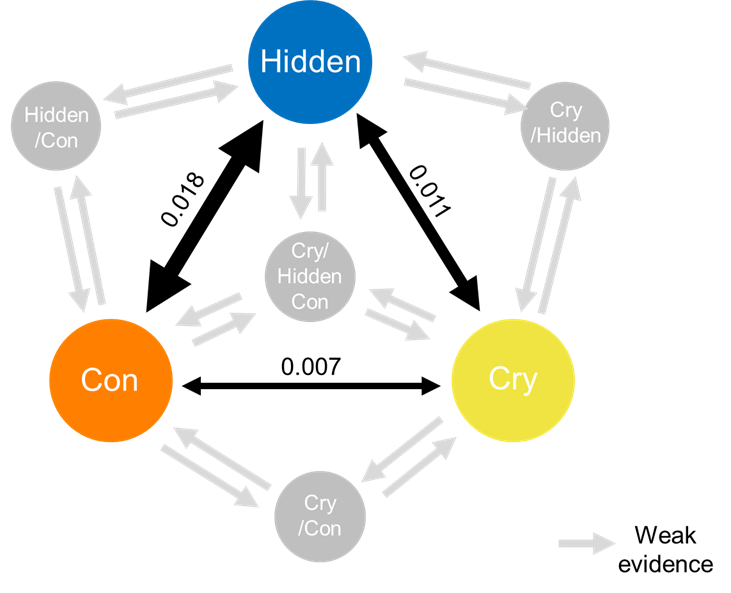


**Figure S2. The transition rates estimated in SYM model (the second-best model).**


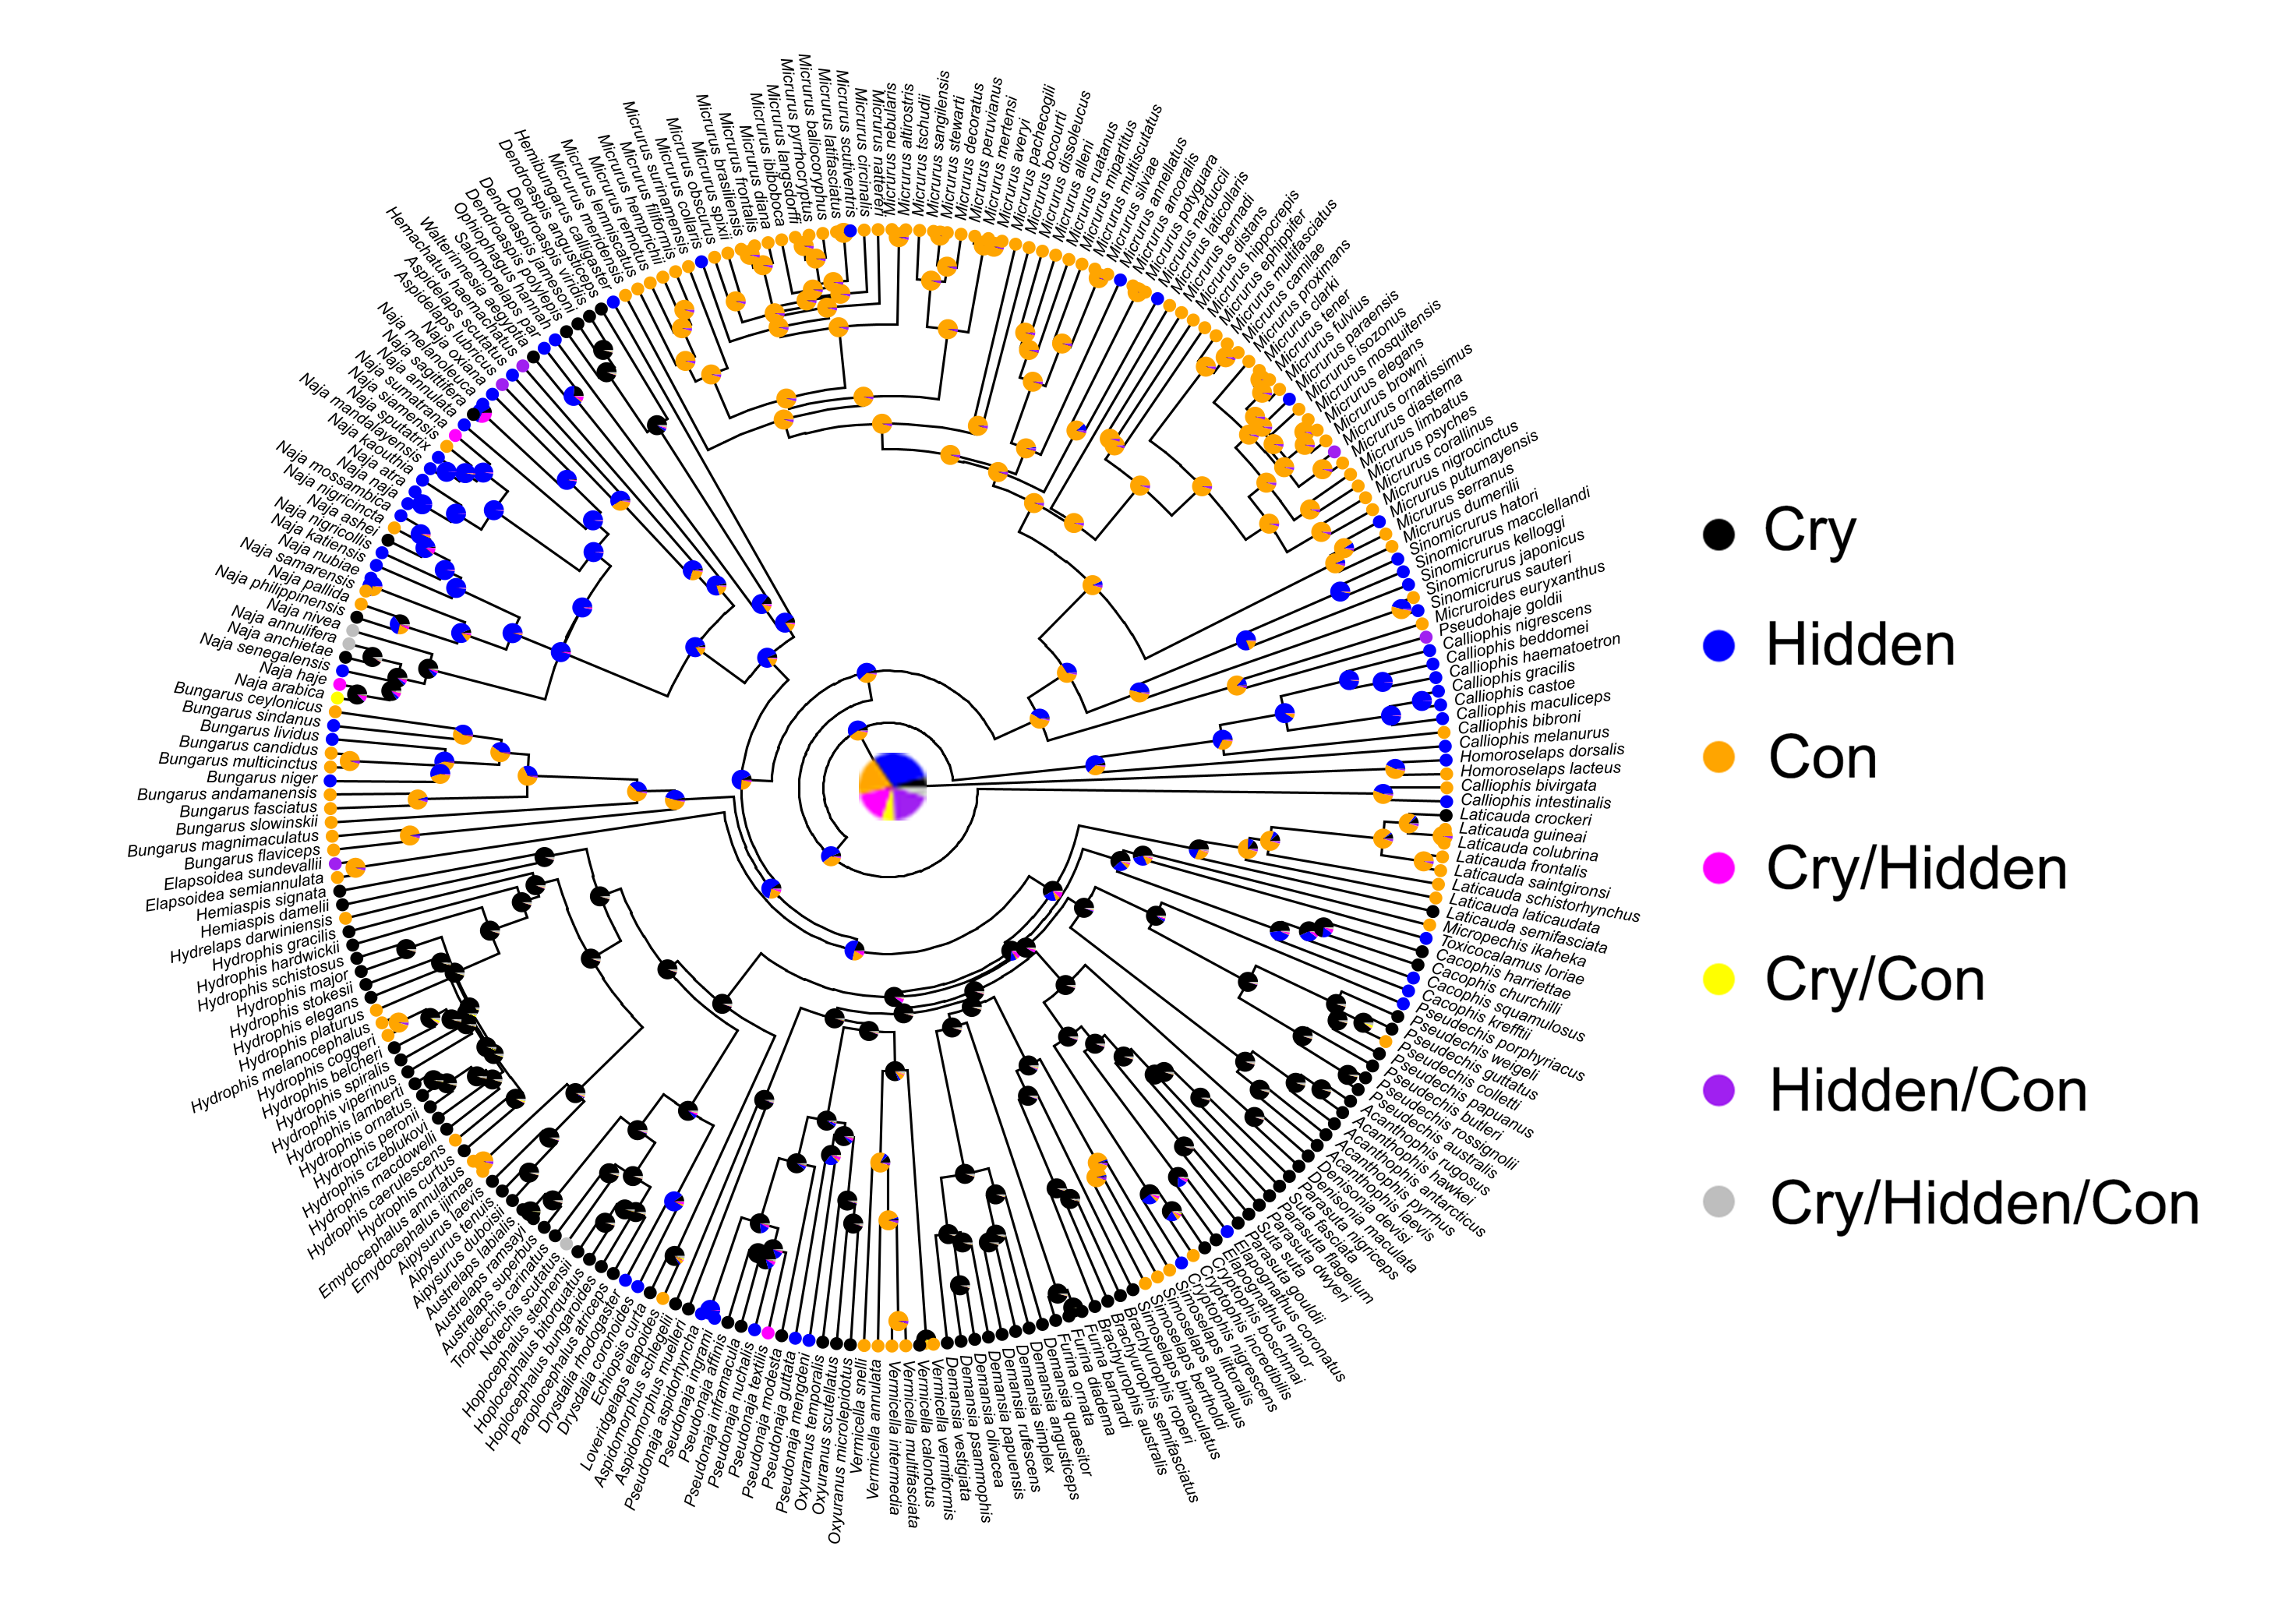


**Figure S3. The results of marginal ancestral character reconstruction using the color dataset. Here the ancestral state was estimated as a matrix of marginal probabilities for each node.**


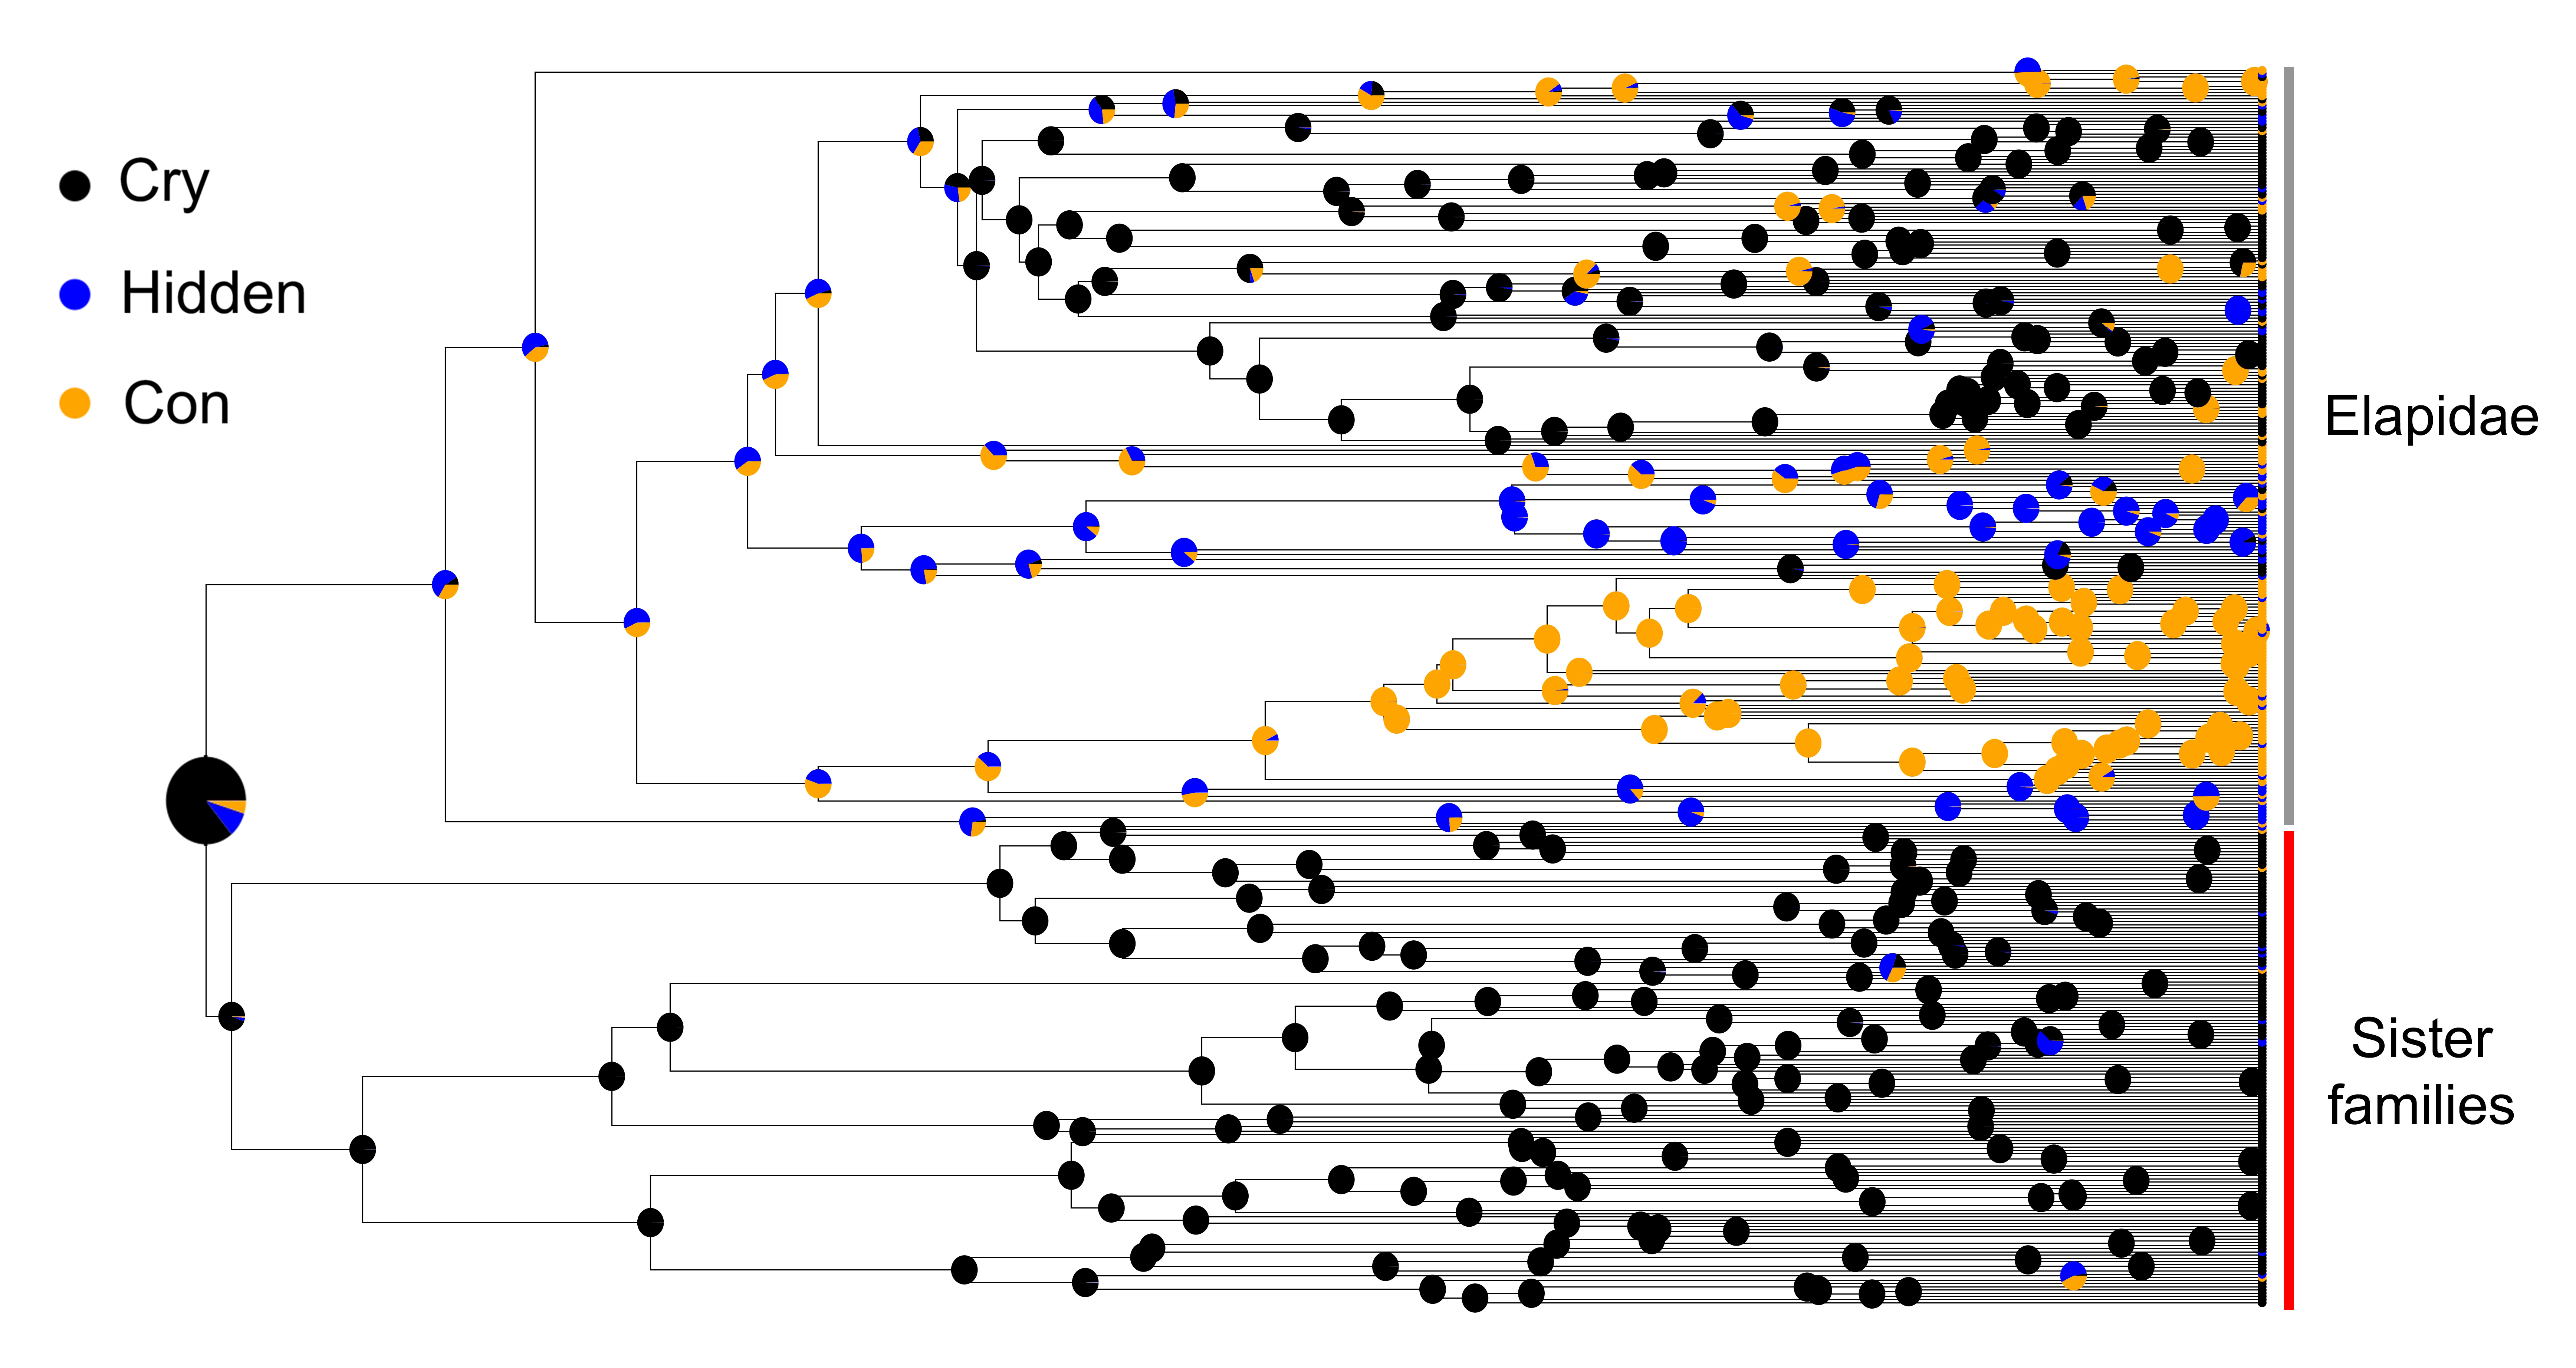


**Figure S4. The results of marginal ancestral character reconstruction using the family Elapidae and its sister families are presented. Polymorphic species, all of which evolved near the tip of the phylogeny and are present only in the family Elapidae, were excluded from this analysis for providing simpler results. However, including the polymorphic species does not change the ancestral state of the common ancestor between Elapidae and its sister clades.**

**Table S3. The support of competing models when species with any disagreement in classification were excluded from the analyses.** The ER model remained the best-supported model. The transition rates and ancestral character reconstruction results almost exactly mirrored the main results (Fig. S5).

| Model | Log likelihood | Number of parameters | AICc | AIC weight |
| --- | --- | --- | --- | --- |
| ARD | -222.8 | 24 | 493.7 | 0.02 |
| SYM | -223.7 | 21 | 489.4 | 0.17 |
| **ER** | **-224.3** | **19** | **486.6** | **0.69** |
| Intermediate | -224.4 | 22 | 492.9 | 0.03 |
| Cost-offset | -224.4 | 22 | 492.7 | 0.03 |
| Secondary | -223.9 | 22 | 491.8 | 0.15 |


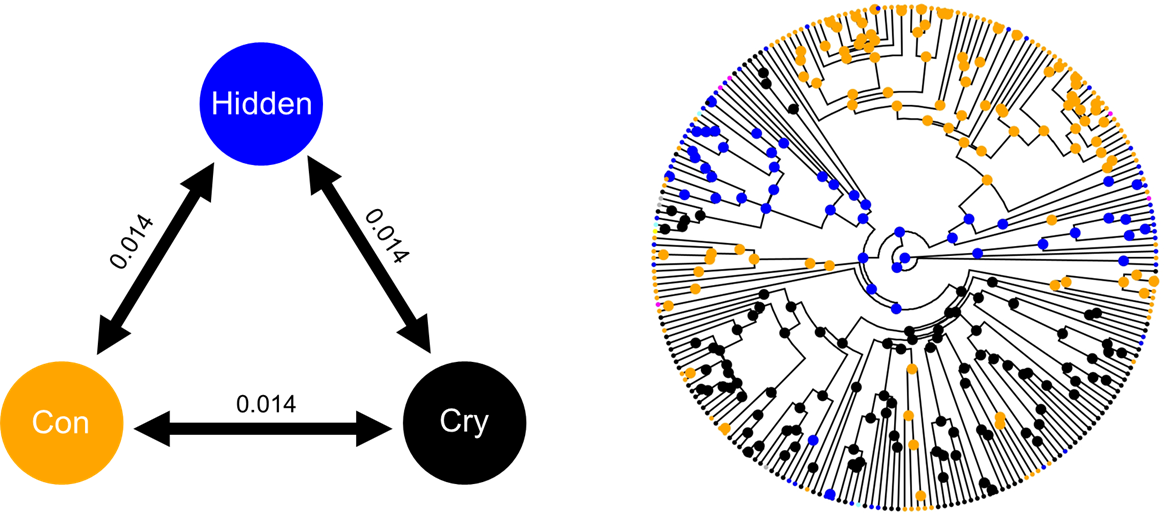


**Figure S5. The estimated transition rates and ancestral character reconstruction results of the best-supported model when species with any disagreement in classification were excluded.**

**Table S4. The support of competing models when polymorphic species were excluded from the analyses.** ER and SYM models were best supported with the same ancestral character reconstruction results which almost exactly corresponds to the main results (Fig. S6).

| Model | Log likelihood | Number of parameters | AICc | AIC weight |
| --- | --- | --- | --- | --- |
| ARD | -182.6 | 6 | 377.2 | 0.27 |
| SYM | -185.3 | 3 | 376.5 | 0.37 |
| ER | -187.3 | 1 | 376.7 | 0.35 |
| Intermediate | -193.6 | 4 | 395.2 | 0.00 |
| Cost-offset | -196.7 | 4 | 401.5 | 0.00 |
| Secondary | -215.6 | 4 | 439.2 | 0.00 |


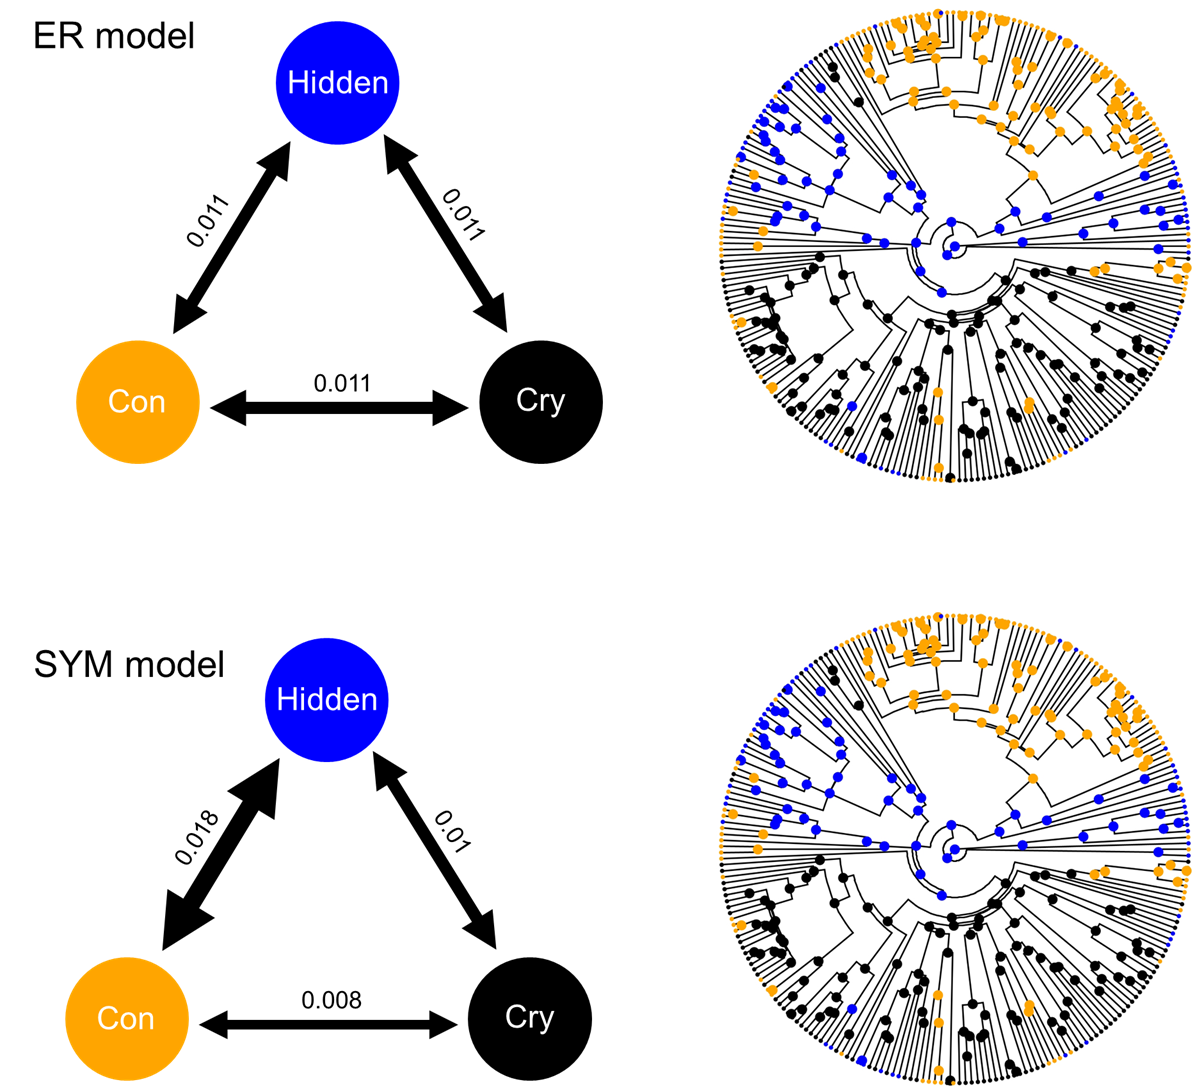


**Figure S6. The estimated transition rates and ancestral character reconstruction results of the two best-supported models when polymorphic species were excluded.**


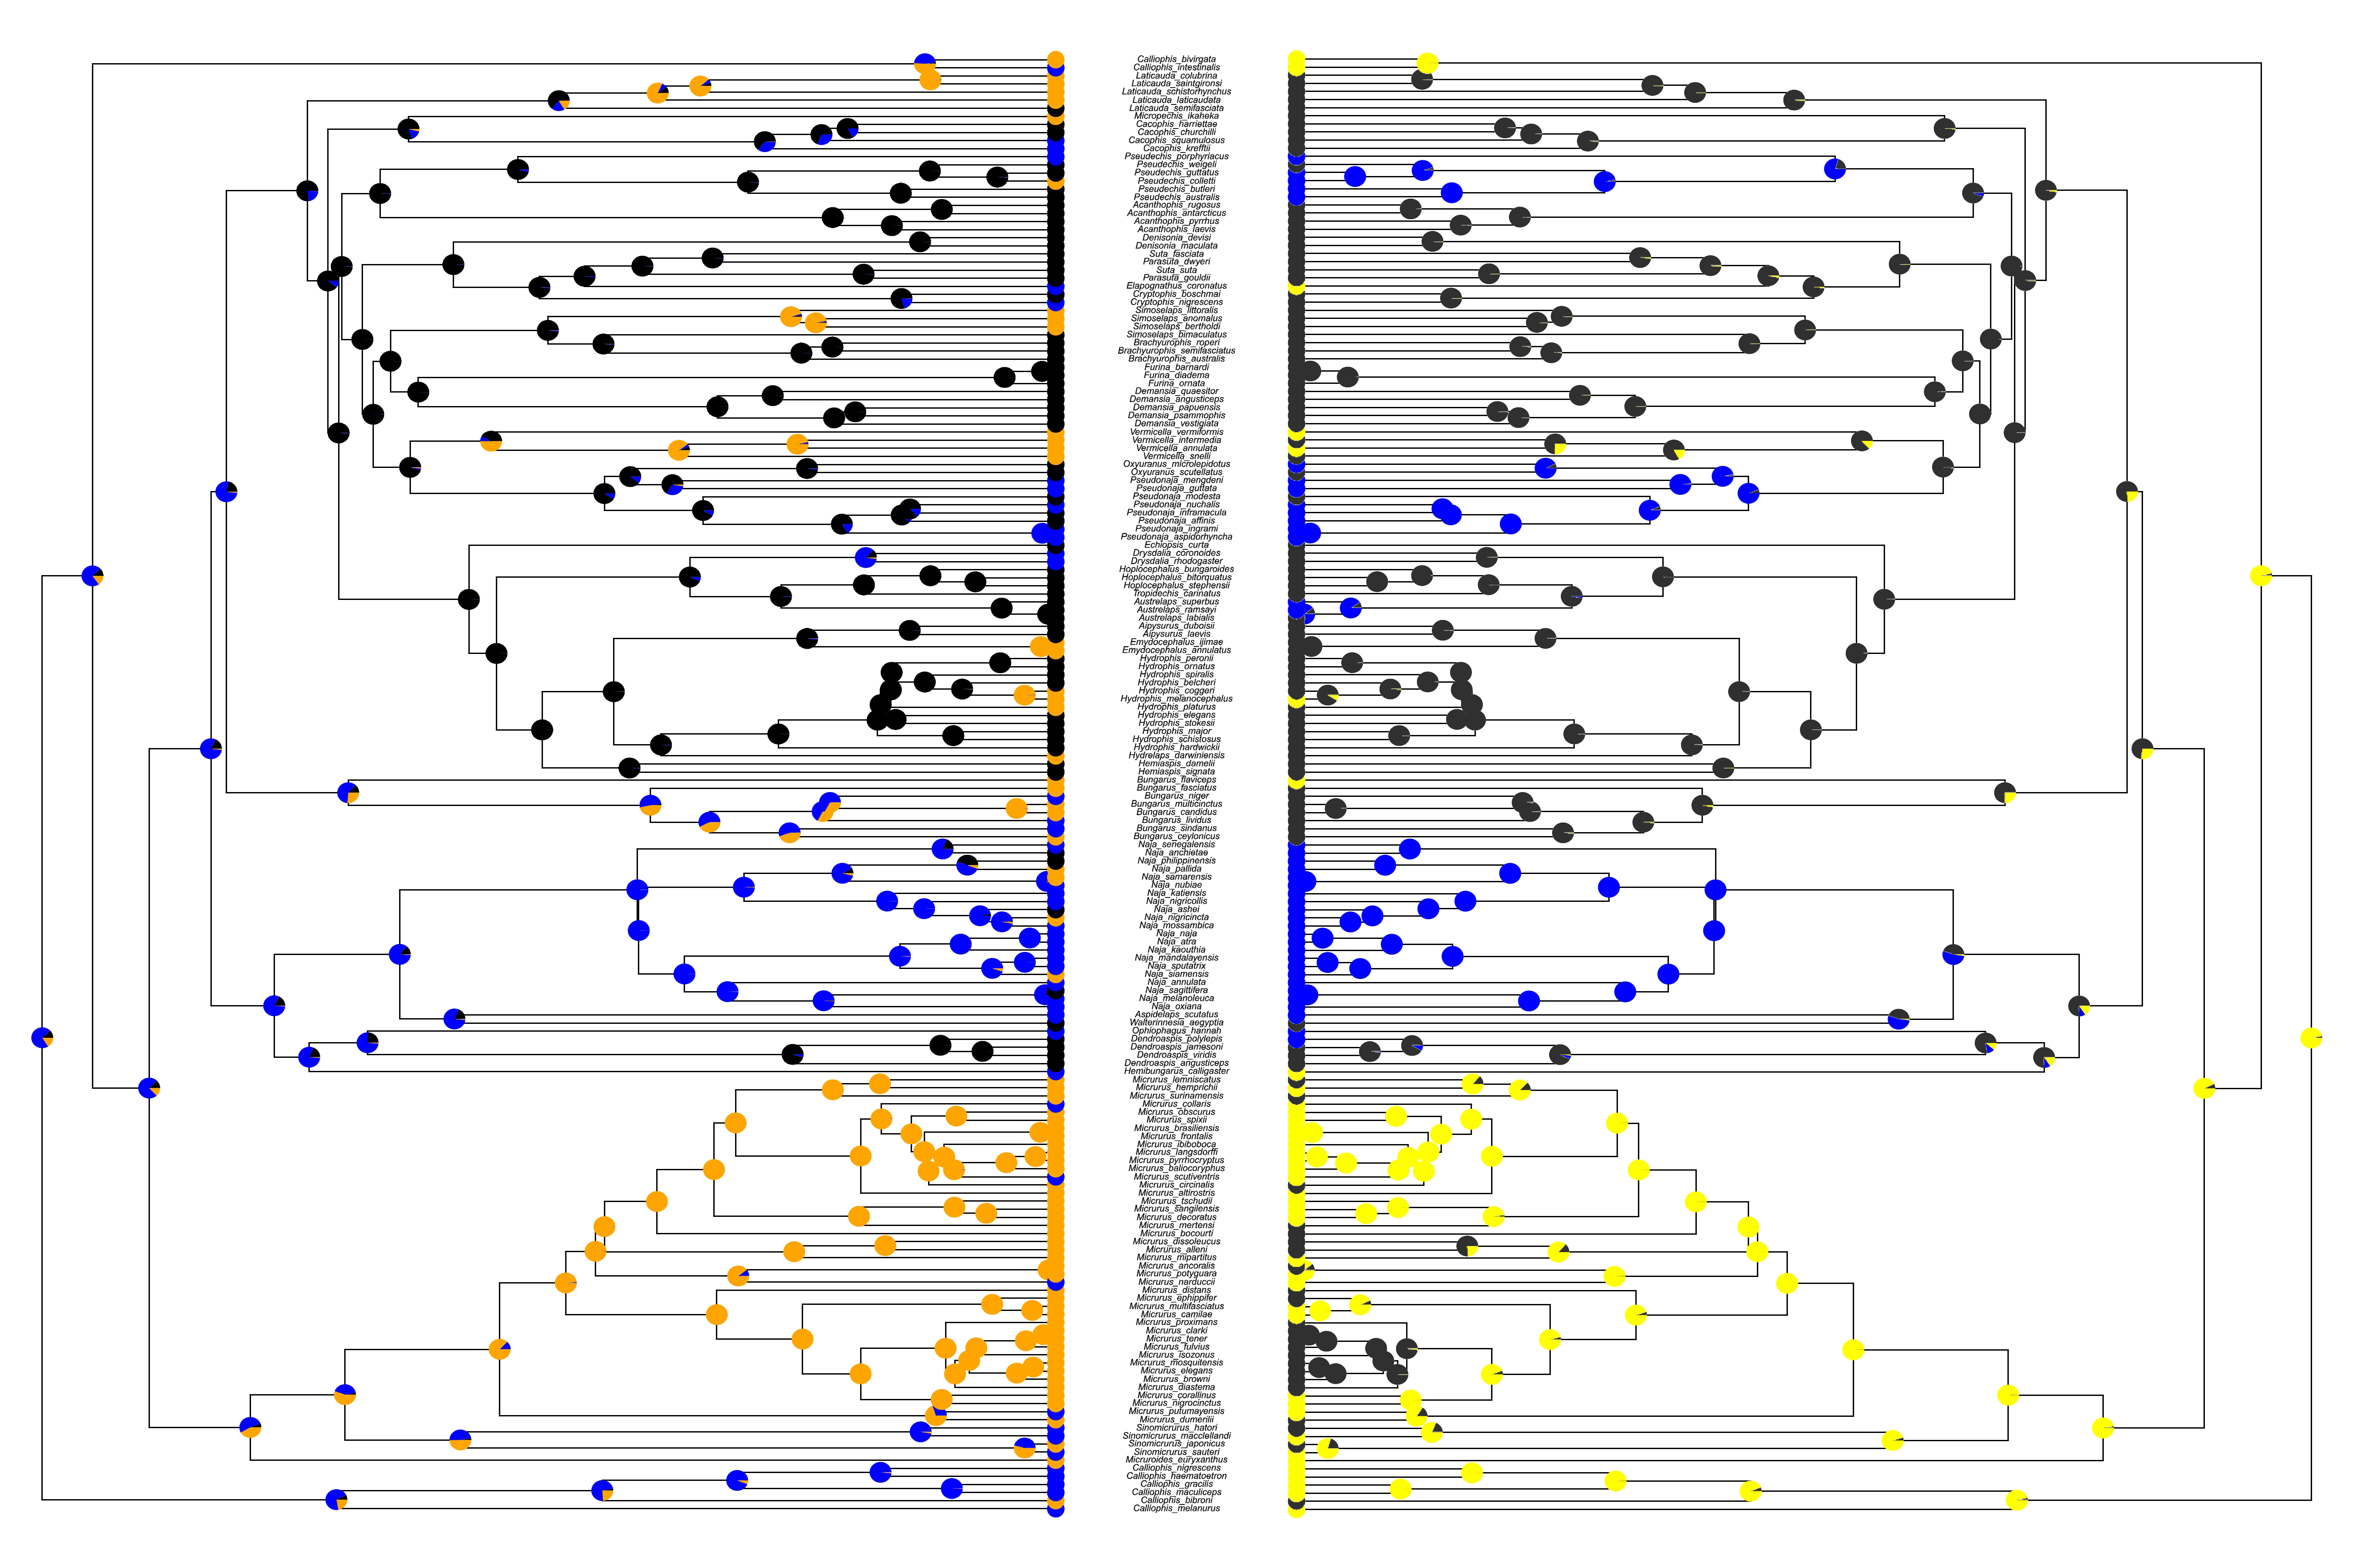


**Figure S5. The results of marginal ancestral character reconstruction using the colour+behaviour dataset.**

**
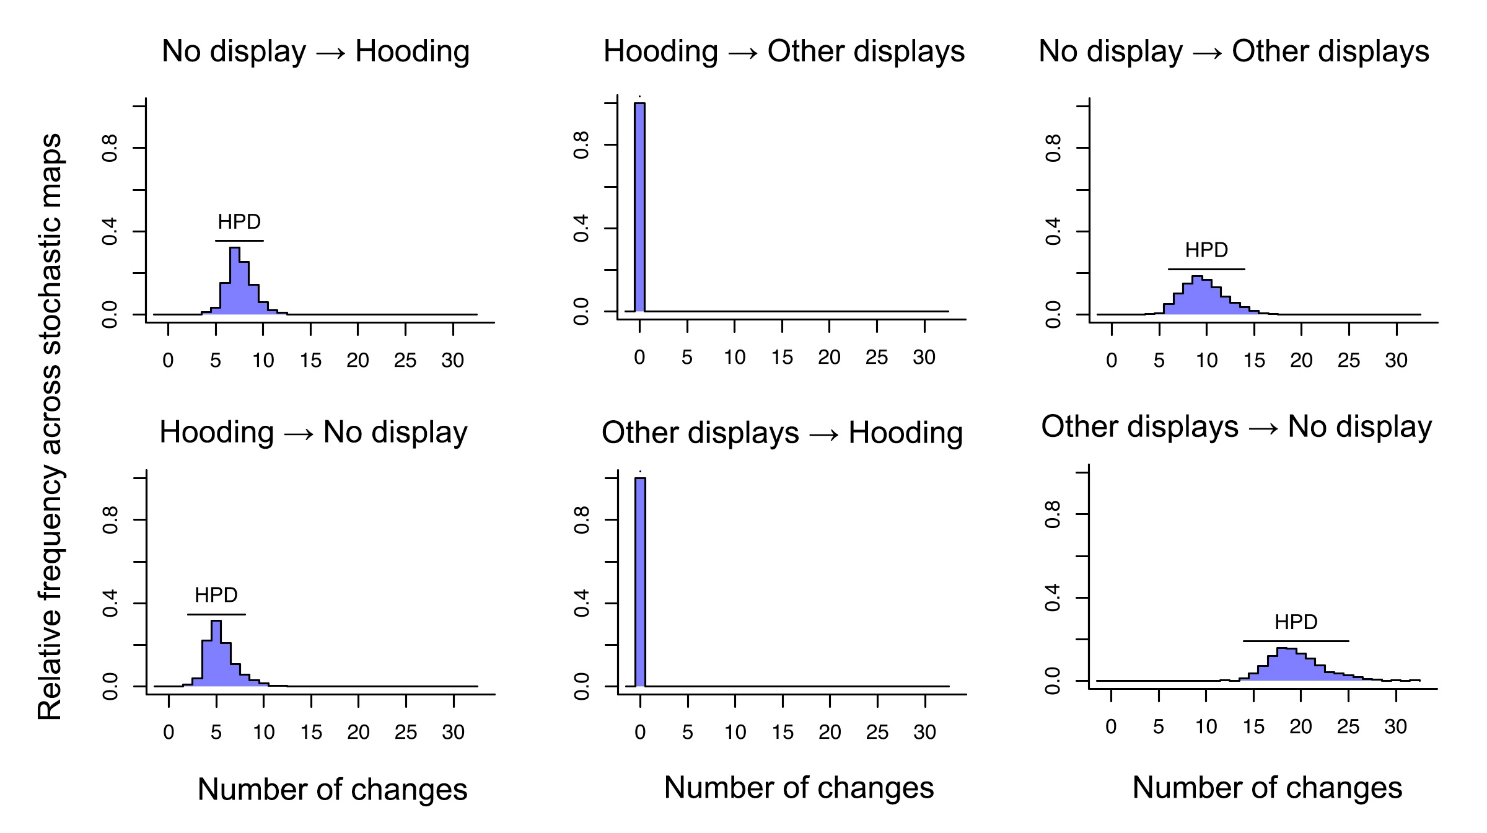
Figure S6. The results of stochastic character mapping for defensive behaviours.** The distribution of number of changes between traits aligns well with the transition rate result; there had been no shift between hooding and other defensive displays and these two defensive behaviours evolve independently from each other.

**Table S5. Species names and author credits of images that were used to generate Figure 3. All images were either under a CC-BY license or public domain images.**

| **Species** | **Authors** | **Source** |
| --- | --- | --- |
| *Micrurus lemniscatus* | Ricardo J. Sawaya | Wikimedia commons |
| *Micrurus altirostris* | Tomás Carranza Perales | Wikimedia commons |
| *Micrurus dissoleucus* | Iván S. Arenas V. | Wikimedia commons |
| *Micrurus narduccii* | Ferhat Gundogdu | Wikimedia commons |
| *Micrurus tener* | LA Dawson | Wikimedia commons |
| *Micrurus browni* | Ruth Percino Daniel | Wikimedia commons |
| *Micrurus corallinus* | Paulo Marcelo Adamek | Wikimedia commons |
| *Sinomicrurus sauteri* | 向高世 | Wikimedia commons |
| *Calliophis nigrescens* | Rushikesh lohar | Wikimedia commons |
| *Homoroselaps lacteus* | Oliver Angus | Wikimedia commons |
| *Laticauda colubrina* | Jens Petersen | Wikimedia commons |
| *Pseudechis guttatus* | Max Tibby | Wikimedia commons |
| *Pseudechis australis* | Max Tibby | Wikimedia commons |
| *Suta suta* | Max Tibby | Wikimedia commons |
| *Cryptophis nigrescens* | Scott Warner | Wikimedia commons |
| *Brachyurophis australis* | Max Tibby | Wikimedia commons |
| *Demansia psammophis* | Mark_Green_13 | Wikimedia commons |
| *Vermicella annulata* | Will Brown | Wikimedia commons |
| *Pseudonaja textilis* | Xyxyzyz | Wikimedia commons |
| *Hoplocephalus bungaroides* | Alan | Wikimedia commons |
| *Emydocephalus ijimae* | Lu i-chi | Wikimedia commons |
| *Hydrophis lamberti* | Franco Colnago | Wikimedia commons |
| *Elapsoidea sundevallii* | Marius Burger | Wikimedia commons |
| *Bungarus fasciatus* | 灯管儿 | Wikimedia commons |
| *Naja philippinensis* | MorphinESTP | Wikimedia commons |
| *Naja naja* | Raju Kasambe | Wikimedia commons |
| *Naja oxiana* | Ali Khani | Wikimedia commons |
| *Ophiophagus hannah* | TimVickers | Wikimedia commons |

**Table S6. Image sources used for color classification.**

| **Species** | **Image sources 1** | **Image sources 2** | **Image sources 3** | **Image sources 4** |
| --- | --- | --- | --- | --- |
| *Acanthophis antarcticus* | https://www.shannonwild.com/image/I00009R7kT4N9dYA | https://reptile-database.reptarium.cz/species?genus=Acanthophis&species=antarcticus |  |  |
| *Acanthophis cryptamydros* | https://www.researchgate.net/figure/Acanthophis-cryptamydros-sp-nov-holotype-WAM-R174083-showing-dorsal-and-ventral_fig6_281288432 |  | https://reptile-database.reptarium.cz/species?genus=Acanthophis&species=cryptamydros |  |
| *Acanthophis hawkei* | https://www.mindenpictures.com/stock-photo-barkly-death-adder-acanthophis-hawkei-aged-11-months-captive-bred-naturephotography-image90813293.html | https://reptile-database.reptarium.cz/species?genus=Acanthophis&species=hawkei |  |  |
| *Acanthophis laevis* | https://venomland.forumotion.com/t710-acanthophis-laevis | https://www.flickr.com/photos/midlandsreptiles/28954445393 | https://inaturalist.ca/taxa/35052-Acanthophis-laevis |  |
| *Acanthophis pyrrhus* | https://inaturalist.ca/taxa/35056-Acanthophis-pyrrhus/browse_photos | https://inaturalist.ca/taxa/35056-Acanthophis-pyrrhus/browse_photos | https://inaturalist.ca/taxa/35056-Acanthophis-pyrrhus/browse_photos |  |
| *Acanthophis rugosus* | https://www.youtube.com/watch?v=J0e0kmrs_AM | https://reptile-database.reptarium.cz/species?genus=Acanthophis&species=rugosus | https://reptile-database.reptarium.cz/species?genus=Acanthophis&species=rugosus |  |
| *Aipysurus duboisii* | https://inaturalist.ca/taxa/35263-Aipysurus-duboisii/browse_photos | https://inaturalist.ca/taxa/35263-Aipysurus-duboisii/browse_photos | https://inaturalist.ca/taxa/35263-Aipysurus-duboisii/browse_photos | https://inaturalist.ca/taxa/35263-Aipysurus-duboisii/browse_photos |
| *Aipysurus laevis* | https://www.inaturalist.org/taxa/35260-Aipysurus-laevis | https://oceana.org/marine-life/olive-sea-snake/ | https://www.naturepl.com/stock-photo-two-olive-brown-sea-snakes-aipysurus-laevis-interacting-venomous-image01505478.html | http://www.ourwildlife.com.au/elapids/194-broad-headed-snake-hoplocephalus-bungaroides |
| *Aipysurus pooleorum* | https://www.inaturalist.org/taxa/539231-Aipysurus-pooleorum/browse_photos | https://www.inaturalist.org/taxa/539231-Aipysurus-pooleorum/browse_photos |  |  |
| *Aipysurus tenuis* | https://reeflifesurvey.com/species/aipysurus-tenuis/ |  |  |  |
| *Antaioserpens albiceps* | https://www.flickr.com/photos/shaneblackfnq/38713907885 | https://www.flickr.com/photos/elliotbudd/37331164970 | http://treatment.plazi.org/id/03A81A62FF96FFC8FF6564BAFC61F246 |  |
| *Aspidelaps lubricus* | https://www.inaturalist.org/taxa/30464-Aspidelaps-lubricus/browse_photos | https://www.flickr.com/photos/cowyeow/4530250215 |
| *Aspidelaps scutatus* | https://inaturalist.ca/taxa/30461-Aspidelaps-scutatus | https://www.tyroneping.co.za/snakes-southern-africa/aspidelaps-scutatus-fulafula-eastern-shield-nose-snake/ | http://www.the-eis.com/atlas/?q=mammal-description&taxon_meaning_id=2967 | https://www.pinterest.com/pin/326511041710389416/ |
| *Aspidomorphus muelleri* | https://www.inaturalist.org/taxa/35075-Aspidomorphus-muelleri/browse_photos |  | http://www.toxinology.com/fusebox.cfm?fuseaction=main.snakes.display&id=SN0622 |  |
| *Aspidomorphus schlegelii* | https://www.inaturalist.org/observations/128436674 | https://reptile-database.reptarium.cz/species?genus=Aspidomorphus&species=muelleri |  |  |
| *Austrelaps labialis* | https://www.mindenpictures.com/stock-photo-adelaide-pygmy-copperhead-snake-austrelaps-labialis-strike-pose-south-naturephotography-image90185869.html |  | https://reptile-database.reptarium.cz/species?genus=Austrelaps&species=labialis |  |
| *Austrelaps ramsayi* | https://www.flickr.com/photos/23031163@N03/41620667665 | https://reptile-database.reptarium.cz/species?genus=Austrelaps&species=ramsayi | https://www.flickr.com/photos/58349528@N02/28351753504 | https://collections.museumsvictoria.com.au/species/8786 |
| *Austrelaps superbus* | https://www.natureinstock.com/search/preview/lowland-copperhead-austrelaps-superbus-male-snake-basking-donnybrook/0_12566979.html | https://www.projectnoah.org/spottings/2001976002 | https://www.flickr.com/photos/126237772@N07/29519598664 | https://collections.museumsvictoria.com.au/species/8787 |
| *Brachyurophis australis* | https://apps.des.qld.gov.au/species-search/details/?id=460 |  | https://calphotos.berkeley.edu/cgi/img_query?enlarge=0000+0000+1211+0469 |  |
| *Brachyurophis campbelli* | https://www.inaturalist.org/taxa/558846-Brachyurophis-campbelli/browse_photos | https://www.inaturalist.org/taxa/558846-Brachyurophis-campbelli/browse_photos |  |  |
| *Brachyurophis roperi* | https://twitter.com/alanadelaive/status/1043344010251649025 |  |  |  |
| *Brachyurophis semifasciatus* | https://www.flickr.com/photos/jasminevink/46262298224 | https://reptile-database.reptarium.cz/species?genus=Brachyurophis&species=semifasciatus | https://www.mindenpictures.com/stock-photo-southern-shovel-nosed-sake-brachyurophis-semifasciatus-coastal-sand-naturephotography-image90729724.html |  |
| *Bungarus andamanensis* | https://www.inaturalist.org/taxa/30453-Bungarus-andamanensis/browse_photos |  |  |  |
| *Bungarus candidus* | https://en.wikipedia.org/wiki/Bungarus_candidus |  | https://a-z-animals.com/animals/malayan-krait/ |  |
| *Bungarus ceylonicus* | https://reptile-database.reptarium.cz/species?genus=Bungarus&species=ceylonicus |  |  |  |
| *Bungarus fasciatus* | https://www.monaconatureencyclopedia.com/bungarus-fasciatus/?lang=en |  | https://www.thainationalparks.com/species/bungarus-fasciatus |  |
| *Bungarus flaviceps* | https://reptile-database.reptarium.cz/species?genus=Bungarus&species=flaviceps |  | https://exotic-venom.tumblr.com/post/174446031371/bungarus-flaviceps-identification |  |
| *Bungarus lividus* | https://www.researchgate.net/figure/Lesser-Black-Krait-Bungarus-lividus-Ventral-side-of-the-same-snake-showing-the-light_fig18_235758972 | https://inaturalist.ca/taxa/30445-Bungarus-lividus/browse_photos | https://inaturalist.ca/taxa/30445-Bungarus-lividus/browse_photos |  |
| *Bungarus magnimaculatus* | https://inaturalist.ca/taxa/96226-Bungarus-magnimaculatus/browse_photos | https://inaturalist.ca/taxa/96226-Bungarus-magnimaculatus/browse_photos |  |  |
| *Bungarus multicinctus* | https://www.hongkongsnakeid.com/many-banded-krait |  | https://reptile-database.reptarium.cz/species?genus=Bungarus&species=multicinctus |  |
| *Bungarus niger* | https://reptile-database.reptarium.cz/species?genus=Bungarus&species=niger | https://www.flickr.com/photos/64374409@N05/27839208173 | https://www.inaturalist.org/taxa/30441-Bungarus-niger |  |
| *Bungarus sindanus* | https://en.wikipedia.org/wiki/Bungarus_sindanus | https://reptile-database.reptarium.cz/species?genus=bungarus&species=sindanus |  |  |
| *Bungarus slowinskii* | https://www.inaturalist.org/taxa/96227-Bungarus-slowinskii/browse_photos |  |  |  |
| *Bungarus suzhenae* | https://news.mongabay.com/2021/04/deadly-new-snake-named-after-mythical-chinese-goddess-of-healing/ |  | https://en.wikipedia.org/wiki/Bungarus_suzhenae |  |
| *Bungarus walli* | https://www.inaturalist.org/taxa/558848-Bungarus-walli/browse_photos | https://www.inaturalist.org/taxa/558848-Bungarus-walli/browse_photos |  |  |
| *Cacophis churchilli* | https://www.flickr.com/photos/shaneblackfnq/31461577466 |  |  |  |
| *Cacophis harriettae* | https://www.flickr.com/photos/angusmcnab/13964479753 | https://reptile-database.reptarium.cz/species?genus=Cacophis&species=harriettae | https://www.inaturalist.org/taxa/35049-Cacophis-harriettae | https://www.inaturalist.org/taxa/35049-Cacophis-harriettae |
| *Cacophis krefftii* | https://southeastsnakecatcher.com.au/dwarf-crowned-snake/ | https://reptile-database.reptarium.cz/species?genus=Cacophis&species=krefftii | https://apps.des.qld.gov.au/species-search/details/?id=502 | https://inaturalist.ca/taxa/35047-Cacophis-krefftii |
| *Cacophis squamulosus* | https://www.flickr.com/photos/smacdonald/2096606014 | https://reptile-database.reptarium.cz/species?genus=Cacophis&species=squamulosus | https://www.australiawidefirstaid.com.au/resources/golden-crowned-snake |  |
| *Calliophis beddomei* | https://indiabiodiversity.org/species/show/257463 | https://en.wikipedia.org/wiki/Beddome%27s_coral_snake |  |  |
| *Calliophis bibroni* | https://en.wikipedia.org/wiki/Calliophis_bibroni |  | https://indiabiodiversity.org/species/show/257458 |  |
| *Calliophis bilineatus* | https://palawanwildfrontier.blogspot.com/2020/02/two-lined-coral-snake.html | https://reptile-database.reptarium.cz/species?genus=Calliophis&species=bilineatus&search_param=%28%28search%3D%27snakes%27%29%29 |  |  |
| *Calliophis bivirgatus* | https://inaturalist.ca/taxa/558849-Calliophis-bivirgatus |  | https://www.hongkongsnakeid.com/malayan-blue-coral-snake |  |
| *Calliophis castoe* | https://www.researchgate.net/figure/Calliophis-castoe-venter-of-subadult-female-paratype-BNHS-3474-313-mm-TL-from-Ambe_fig2_260086305 | https://www.researchgate.net/figure/Calliophis-castoe-dorsum-of-live-adult-male-specimen-not-collected-from-Dicholi-Goa_fig1_260086305 | https://indiabiodiversity.org/observation/show/17035373 |  |
| *Calliophis gracilis* | https://www.flickr.com/photos/59583171@N07/14035330449 |  | https://uk.inaturalist.org/taxa/30424-Calliophis-gracilis |  |
| *Calliophis haematoetron* | https://reptile-database.reptarium.cz/species?genus=Calliophis&species=haematoetron |  | https://inaturalist.ca/taxa/96465-Calliophis-haematoetron/browse_photos |  |
| *Calliophis intestinalis* | https://photos.chienclee.com/image/I00009WMwRIE2k7A |  | https://www.flickr.com/photos/artour_a/4712108294 |  |
| *Calliophis maculiceps* | https://www.researchgate.net/figure/Live-adult-male-Calliophis-maculiceps-KUZ-R-74136-from-Yommalath-District-Khammouane_fig1_339768240 |  |  | https://www.thainationalparks.com/species/calliophis-maculiceps |
| *Calliophis melanurus* | https://inaturalist.ca/taxa/68529-Calliophis-melanurus |  | https://inaturalist.ca/taxa/68529-Calliophis-melanurus |  |
| *Calliophis nigrescens* | https://reptile-database.reptarium.cz/species?genus=calliophis&species=nigrescens | https://reptile-database.reptarium.cz/species?genus=calliophis&species=nigrescens |  |  |
| *Calliophis nigrotaeniatus* | https://ones-habitat.hatenablog.com/entry/2019/01/14/020736 | https://ones-habitat.hatenablog.com/entry/2019/01/14/020736 | https://www.flickr.com/photos/55114263@N00/49328426418 | https://reptile-database.reptarium.cz/species?genus=Calliophis&species=nigrotaeniatus&search_param=%28%29 |
| *Cryptophis boschmai* | https://www.inaturalist.org/taxa/318660-Cryptophis-boschmai/browse_photos | https://www.inaturalist.org/taxa/318660-Cryptophis-boschmai/browse_photos | https://www.inaturalist.org/taxa/318660-Cryptophis-boschmai/browse_photos | https://www.inaturalist.org/taxa/318660-Cryptophis-boschmai/browse_photos |
| *Cryptophis incredibilis* | https://bie.ala.org.au/species/https://biodiversity.org.au/afd/taxa/e9458bef-eb45-4070-aac4-d12962232081 |  |  |  |
| *Cryptophis nigrescens* | https://arod.com.au/arod/reptilia/Squamata/Elapidae/Cryptophis/nigrescens | https://bendofislands.wordpress.com/flora-and-fauna/reptiles/small-eyed-snake/ | https://www.flickr.com/photos/141679113@N08/50780862741 | https://www.inaturalist.org/taxa/35134-Cryptophis-nigrescens |
| *Demansia angusticeps* | https://www.flickr.com/photos/shaneblackfnq/31237712660 |  | https://www.flickr.com/photos/stephenmahony/13071309794 | https://uk.inaturalist.org/taxa/99174-Demansia-angusticeps |
| *Demansia olivacea* | https://www.flickr.com/photos/reptileshots/17451513423 |  | https://www.inaturalist.org/taxa/35040-Demansia-olivacea |  |
| *Demansia papuensis* | https://uk.inaturalist.org/taxa/99176-Demansia-papuensis/browse_photos | https://uk.inaturalist.org/taxa/99176-Demansia-papuensis/browse_photos | https://uk.inaturalist.org/taxa/99176-Demansia-papuensis/browse_photos | https://uk.inaturalist.org/taxa/99176-Demansia-papuensis/browse_photos |
| *Demansia psammophis* | https://en.wikipedia.org/wiki/Yellow-faced_whipsnake | https://australian.museum/learn/animals/reptiles/yellow-faced-whip-snake/ | https://inaturalist.ca/taxa/35034-Demansia-psammophis/browse_photos | https://inaturalist.ca/taxa/35034-Demansia-psammophis/browse_photos |
| *Demansia quaesitor* | https://vimeo.com/90274019 | https://reptile-database.reptarium.cz/species?genus=Demansia&species=quaesitor | https://apps.des.qld.gov.au/species-search/details/?id=31914 |  |
| *Demansia reticulata* | https://vertebrate-zoology.arphahub.com/article/89647/zoom/fig/15/ | https://vertebrate-zoology.arphahub.com/article/89647/zoom/fig/15/ | https://inaturalist.ca/taxa/539606-Demansia-reticulata/browse_photos | https://inaturalist.ca/taxa/539606-Demansia-reticulata/browse_photos |
| *Demansia rufescens* | https://uk.inaturalist.org/taxa/35032-Demansia-rufescens/browse_photos | https://uk.inaturalist.org/taxa/35032-Demansia-rufescens/browse_photos |  |  |
| *Demansia simplex* | https://www.flickr.com/photos/reptileshots/8269183692 | https://reptile-database.reptarium.cz/species?genus=Demansia&species=simplex |  |  |
| *Demansia vestigiata* | https://inaturalist.ca/taxa/35041-Demansia-vestigiata/browse_photos | https://inaturalist.ca/taxa/35041-Demansia-vestigiata/browse_photos | https://inaturalist.ca/taxa/35041-Demansia-vestigiata/browse_photos | https://inaturalist.ca/taxa/35041-Demansia-vestigiata/browse_photos |
| *Dendroaspis angusticeps* | https://www.tyroneping.co.za/snakes-southern-africa/dendroaspis-angusticeps-eastern-green-mamba/ | https://reptile-database.reptarium.cz/species?genus=Dendroaspis&species=angusticeps | https://www.tyroneping.co.za/snakes-southern-africa/dendroaspis-angusticeps-eastern-green-mamba/ |  |
| *Dendroaspis jamesoni* | http://www.toxinology.com/fusebox.cfm?fuseaction=main.snakes.display&id=SN0169 | https://en.wikipedia.org/wiki/Jameson%27s_mamba#/media/File:Dendroaspis_jamesoni_kaimosae_IMG_5053.jpg | https://www.sciencephoto.com/media/380030/view/jameson-s-mamba | https://www.pinterest.com/pin/calphotos-dendroaspis-jamesoni-jamesons-blacktailed-mamba--228065168600563816/ |
| *Dendroaspis polylepis* | https://www.sanbi.org/animal-of-the-week/black-mamba/ | https://www.sanbi.org/animal-of-the-week/black-mamba/ | https://www.alamy.com/presenter-nigel-marven-holding-black-mamba-dendroaspis-polylepis-with-its-mouth-wide-open-hooked-over-a-sticksouth-africa-october-image357487844.html |  |
| *Dendroaspis viridis* | https://www.shutterstock.com/sv/image-photo/western-green-mamba-dendroaspis-viridis-known-743943472 | https://www.biolib.cz/en/image/id181867/ | https://en.wikipedia.org/wiki/Western_green_mamba | https://www.flickr.com/photos/guenterleitenbauer/29249899046 |
| *Denisonia devisi* | https://www.dreamstime.com/mud-adder-de-vis-banded-snake-image202514292 | https://www.inaturalist.org/taxa/35029-Denisonia-devisi/browse_photos |  |  |
| *Denisonia maculata* | https://www.keystonefauna.com.au/2016/06/20/so-tell-me-about-the-yakka-skink-and-the-ornamental-snake/ | https://reptile-database.reptarium.cz/species?genus=Denisonia&species=maculata | https://www.inaturalist.org/taxa/35028-Denisonia-maculata/browse_photos |  |
| *Drysdalia coronoides* | https://scontent-ord5-2.xx.fbcdn.net/v/t31.18172-8/10452865_982460151804284_7611055778878358644_o.jpg?stp=cp0_dst-jpg_e15_fr_q65&_nc_cat=102&ccb=1-7&_nc_sid=2d5d41&_nc_ohc=zttZ8JgacqoAX_t1-bt&_nc_ht=scontent-ord5-2.xx&oh=00_AfA3U0OXyTReVZ2WMFgrCSngcMxFX7gaeflS8WpJ3Hso5g&oe=647F8F73 |  | https://reptile-database.reptarium.cz/species?genus=Drysdalia&species=coronoides | https://canberra.naturemapr.org/species/4506 |
| *Drysdalia rhodogaster* | https://exotic-venom.tumblr.com/post/160795215673/drysdalia-rhodogaster-mustard-bellied-snake/amp |  | https://www.inaturalist.org/taxa/35273-Drysdalia-rhodogaster/browse_photos | https://www.inaturalist.org/taxa/35273-Drysdalia-rhodogaster/browse_photos |
| *Echiopsis curta* | https://www.lochmantransparencies.com/products/australian-wildlife/bardick-4/ | https://calphotos.berkeley.edu/cgi/img_query?enlarge=0000+0000+0407+1883 | http://snakeslove.blogspot.com/2012/04/bardick-snake-echiopsis-curta.html | https://www.google.com/url?sa=i&url=https%3A%2F%2Freptile-database.reptarium.cz%2Fspecies%3Fgenus%3DEchiopsis%26species%3Dcurta&psig=AOvVaw0ZwqshCkR6S9_9aNuM9teV&ust=1684081064864000&source=images&cd=vfe&ved=0CBAQjhxqFwoTCJCW_orZ8v4CFQAAAAAdAAAAABAS |
| *Elapognathus coronatus* | https://en.wikipedia.org/wiki/Crowned_snake#/media/File:Elapognathuscoronatus-euankettle.jpg |  |  |  |
| *Elapognathus minor* | https://www.flickr.com/photos/27897324@N07/7667754464/in/photostream/ | https://arod.com.au/arod/index.php?q=author%3D%22Günther%22+yearDescribed%3D1863 | https://reptile-database.reptarium.cz/species?genus=Elapognathus&species=minor |  |
| *Elapsoidea semiannulata* | https://typhlonectes.tumblr.com/post/633609945651249152/elapsoidea-semiannulata-half-banded-african |  |  |  |
| *Elapsoidea sundevallii* | https://en.wikipedia.org/wiki/Elapsoidea_sundevallii | https://reptile-database.reptarium.cz/species?genus=Elapsoidea&species=sundevallii |
| *Emydocephalus annulatus* | https://reptile-database.reptarium.cz/species?genus=Emydocephalus&species=annulatus |  | https://en.wikipedia.org/wiki/Emydocephalus_annulatus |  |
| *Emydocephalus ijimae* | https://www.flickr.com/photos/okinawaphotos/6180470709 |  | https://www.reeflex.net/tiere/9055_Emydocephalus_annulatus.htm | https://eol.org/pages/46559567 |
| *Emydocephalus orarius* | https://reptile-database.reptarium.cz/species?genus=Emydocephalus&species=orarius |  |  |  |
| *Furina barnardi* | https://www.flickr.com/photos/21331380@N02/5696368364/ | https://reptile-database.reptarium.cz/species?genus=Furina&species=barnardi&search_param=%28%29 | https://www.agefotostock.com/age/en/Stock-Images/furina-barnardi.html | https://uk.inaturalist.org/taxa/35251-Furina-barnardi |
| *Furina diadema* | https://uk.inaturalist.org/taxa/35249-Furina-diadema/browse_photos | https://calphotos.berkeley.edu/cgi/img_query?enlarge=0000+0000+1211+1336 | https://uk.inaturalist.org/taxa/35249-Furina-diadema/browse_photos | https://uk.inaturalist.org/taxa/35249-Furina-diadema/browse_photos |
| *Furina ornata* | https://www.inaturalist.org/taxa/35247-Furina-ornata/browse_photos |  | https://www.mindenpictures.com/stock-photo-moon-snake-furina-ornata-defensive-display-australia-naturephotography-image00510701.html | https://reptile-database.reptarium.cz/species?genus=Furina&species=ornata |
| *Hemachatus haemachatus* | https://www.worldlifeexpectancy.com/reptile-life-expectancy-ringneck-spitting-cobra | https://www.inaturalist.org/taxa/30652-Hemachatus-haemachatus/browse_photos |
| *Hemiaspis damelii* | https://www.inaturalist.org/taxa/35244-Hemiaspis-damelii/browse_photos | https://www.inaturalist.org/taxa/35244-Hemiaspis-damelii/browse_photos | https://calphotos.berkeley.edu/cgi/img_query?enlarge=0000+0000+0512+0431 |  |
| *Hemiaspis signata* | https://www.researchgate.net/figure/Black-bellied-Swamp-Snake-Hemiaspis-signata-found-as-roadkill-Photo-Oatley-Flora-and_fig1_329718528 | https://reptile-database.reptarium.cz/species?genus=Hemiaspis&species=signata | https://uk.inaturalist.org/taxa/35245-Hemiaspis-signata |  |
| *Hemibungarus calligaster* | https://reptile-database.reptarium.cz/species?genus=Hemibungarus&species=calligaster |  |  |  |
| *Hemibungarus mcclungi* | https://animalsoftanay.home.blog/2019/11/26/barred-coral-snake/ |  | https://reptile-database.reptarium.cz/species?genus=Hemibungarus&species=calligaster |  |
| *Homoroselaps dorsalis* | https://www.africansnakebiteinstitute.com/snake/striped-harlequin-snake/ | https://www.inaturalist.org/taxa/116524-Homoroselaps-dorsalis/browse_photos | https://www.inaturalist.org/taxa/116524-Homoroselaps-dorsalis/browse_photos | https://www.inaturalist.org/taxa/116524-Homoroselaps-dorsalis/browse_photos |
| *Homoroselaps lacteus* | https://en.wikipedia.org/wiki/Homoroselaps_lacteus |  | https://www.tyroneping.co.za/snakes-southern-africa/homoroselaps-lacteus-spotted-harlequin-snake/ |  |
| *Hoplocephalus bitorquatus* | https://bioone.org/journals/australian-journal-of-zoology/volume-65/issue-6/ZO18009/Population-ecology-of-a-cryptic-arboreal-snake-Hoplocephalus-bitorquatus/10.1071/ZO18009.short | https://reptile-database.reptarium.cz/species?genus=Hoplocephalus&species=bitorquatus | https://eol.org/pages/963551 | https://www.flickr.com/photos/21331380@N02/6686714939/ |
| *Hoplocephalus bungaroides* | https://reptile-database.reptarium.cz/species?genus=Hoplocephalus&species=bungaroides | http://animal.memozee.com/view.php?tid=3&did=19870 | http://www.ourwildlife.com.au/elapids/194-broad-headed-snake-hoplocephalus-bungaroides | https://en.wikipedia.org/wiki/Broad-headed_snake |
| *Hoplocephalus stephensii* | https://reptile-database.reptarium.cz/species?genus=Hoplocephalus&species=stephensii |  | http://www.snakecatchers.com.au/stephens-banded.php |  |
| *Hydrelaps darwiniensis* | https://www.flickr.com/photos/reptileshots/7423066324 |  |  |  |
| *Hydrophis belcheri* | https://en.wikipedia.org/wiki/Hydrophis_belcheri#/media/File:Hydrophis_belcheri_-_journal.pone.0027373.g005.png |  |  |  |
| *Hydrophis caerulescens* | https://indiabiodiversity.org/species/show/227389 |  | https://reptile-database.reptarium.cz/species?genus=Hydrophis&species=caerulescens |  |
| *Hydrophis coggeri* | https://inaturalist.ca/taxa/104140-Hydrophis-coggeri |  | https://inaturalist.ca/taxa/104140-Hydrophis-coggeri |  |
| *Hydrophis curtus* | https://www.inaturalist.org/taxa/200386-Hydrophis-curtus/browse_photos |  | https://www.inaturalist.org/taxa/200386-Hydrophis-curtus/browse_photos |  |
| *Hydrophis czeblukovi* | https://reptile-database.reptarium.cz/species?genus=Hydrophis&species=czeblukovi |  |  |  |
| *Hydrophis elegans* | https://www.flickr.com/photos/fins72/37184091302 |  | https://reptile-database.reptarium.cz/species?genus=Hydrophis&species=elegans |  |
| *Hydrophis gracilis* | https://www.inaturalist.org/taxa/121089-Hydrophis-gracilis/browse_photos |  |  |  |
| *Hydrophis hardwickii* | https://www.reptilefact.com/hardwickes-sea-snake.html |  |  |  |
| *Hydrophis lamberti* | https://inaturalist.ca/taxa/97546-Hydrophis-lamberti/browse_photos |  | https://inaturalist.ca/taxa/97546-Hydrophis-lamberti/browse_photos |  |
| *Hydrophis macdowelli* | https://www.inaturalist.org/taxa/35215-Hydrophis-macdowelli/browse_photos |  | https://www.inaturalist.org/taxa/35215-Hydrophis-macdowelli/browse_photos |  |
| *Hydrophis major* | https://ausargenomics.com/reference-genomes/hydrophis-genome/ |  |  |  |
| *Hydrophis melanocephalus* | https://www.flickr.com/photos/okinawaphotos/26951312491 | https://guatemala.inaturalist.org/taxa/35216-Hydrophis-melanocephalus | https://en.wikipedia.org/wiki/Hydrophis_melanocephalus | https://shiny-ace.com/zukan2-e/yuurinmoku-e/kurogashiraumihebi-e.html |
| *Hydrophis ocellatus* | https://reptile-database.reptarium.cz/species?genus=Hydrophis&species=ocellatus |  | http://reptilesofaustralia.com/snakes/marine/Hydrophis_ornatus.html |  |
| *Hydrophis ornatus* | https://www.inaturalist.org/taxa/35204-Hydrophis-ornatus/browse_photos |  | https://www.inaturalist.org/taxa/35204-Hydrophis-ornatus/browse_photos |  |
| *Hydrophis peronii* | https://inaturalist.ca/taxa/200394-Hydrophis-peronii |  |  |  |
| *Hydrophis platurus* | https://eol.org/pages/37135449 |  | https://www.inaturalist.org/taxa/35164-Hydrophis-platurus |  |
| *Hydrophis schistosus* | https://inaturalist.ca/taxa/318698-Hydrophis-schistosus/browse_photos | https://inaturalist.ca/taxa/318698-Hydrophis-schistosus/browse_photos | https://inaturalist.ca/taxa/318698-Hydrophis-schistosus/browse_photos | https://inaturalist.ca/taxa/318698-Hydrophis-schistosus/browse_photos |
| *Hydrophis spiralis* | https://inaturalist.ca/taxa/35211-Hydrophis-spiralis/browse_photos | https://inaturalist.ca/taxa/35211-Hydrophis-spiralis/browse_photos | https://inaturalist.ca/taxa/35211-Hydrophis-spiralis/browse_photos | https://inaturalist.ca/taxa/35211-Hydrophis-spiralis/browse_photos |
| *Hydrophis stokesii* | https://www.flickr.com/photos/angusmcnab/48604007161 | https://www.facebook.com/marinebiodiversityhub/photos/a.1554420491529027/1930719500565789/?type=3 |  |  |
| *Hydrophis viperinus* | https://reptile-database.reptarium.cz/species?genus=Hydrophis&species=viperinus |  | https://www.inaturalist.org/taxa/318699-Hydrophis-viperinus |  |
| *Laticauda colubrina* | https://reptile-database.reptarium.cz/species?genus=Laticauda&species=colubrina | https://www.thainationalparks.com/species/laticauda-colubrina |  |  |
| *Laticauda crockeri* | https://inaturalist.ca/taxa/35242-Laticauda-crockeri/browse_photos | https://inaturalist.ca/taxa/35242-Laticauda-crockeri/browse_photos |  |  |
| *Laticauda frontalis* | https://novataxa.blogspot.com/2016/09/2006-laticauda-saintgironsi.html?m=1 |  | https://novataxa.blogspot.com/2016/09/2006-laticauda-saintgironsi.html?m=1 |  |
| *Laticauda guineai* | https://www.flickr.com/photos/midlandsreptiles/47826945332 |  |  |  |
| *Laticauda laticaudata* | https://inaturalist.ca/taxa/35239-Laticauda-laticaudata |  | https://en.wikipedia.org/wiki/Blue-lipped_sea_krait |  |
| *Laticauda saintgironsi* | https://reptile-database.reptarium.cz/species?genus=Laticauda&species=saintgironsi |  | https://inaturalist.ca/taxa/68342-Laticauda-saintgironsi |  |
| *Laticauda schistorhyncha* | https://www.inaturalist.org/taxa/717870-Laticauda-schistorhyncha/browse_photos |  | https://www.inaturalist.org/taxa/717870-Laticauda-schistorhyncha/browse_photos |  |
| *Laticauda semifasciata* | https://www.snakesoftaiwan.com/laticauda-semifasciata.html |  |  |  |
| *Loveridgelaps elapoides* | https://inaturalist.ca/taxa/35192-Loveridgelaps-elapoides |  |  |  |
| *Micropechis ikaheca* | https://uk.inaturalist.org/taxa/35186-Micropechis/browse_photos |  | https://uk.inaturalist.org/taxa/35186-Micropechis/browse_photos |  |
| *Micruroides euryxanthus* | https://reptile-database.reptarium.cz/species?genus=Micruroides&species=euryxanthus |  | https://www.inaturalist.org/taxa/30630-Micruroides-euryxanthus |  |
| *Micrurus alleni* | https://reptile-database.reptarium.cz/species?genus=Micrurus&species=alleni |  | https://icp.ucr.ac.cr/en/information-and-materials/venomous-snakes-costa-rica/micrurus-alleni |  |
| *Micrurus altirostris* | https://reptile-database.reptarium.cz/species?genus=Micrurus&species=altirostris |  | https://inaturalist.ca/taxa/105866-Micrurus-altirostris |  |
| *Micrurus ancoralis* | https://reptile-database.reptarium.cz/species?genus=Micrurus&species=ancoralis | https://www.mashpilodge.com/blog/coral-snake/ |  |  |
| *Micrurus annellatus* | https://reptile-database.reptarium.cz/species?genus=Micrurus&species=annellatus | https://www.inaturalist.org/taxa/30607-Micrurus-annellatus |  |  |
| *Micrurus averyi* | https://www.google.com/search?q=Micrurus+averyi&tbm=isch&ved=2ahUKEwiux8jy9-H-AhWGI2IAHZMpBzMQ2-cCegQIABAA&oq=Micrurus+averyi&gs_lcp=CgNpbWcQAzIFCAAQgAQ6BAgAEB5Q6gRYnQhgqQloAHAAeACAATmIAXGSAQEymAEAoAEBqgELZ3dzLXdpei1pbWewAQDAAQE&sclient=img&ei=3e5WZO7kOYbHiLMPk9OcmAM&bih=754&biw=1370&client=safari#imgrc=Brc0WyFjy3nZ9M |  |  |  |
| *Micrurus baliocoryphus* | https://en.wikipedia.org/wiki/Micrurus_baliocoryphus#/media/File:Mucrurus_sp.jpg |  | https://www.inaturalist.org/taxa/30566-Micrurus-baliocoryphus/browse_photos |  |
| *Micrurus bernadi* | https://en.wikipedia.org/wiki/Micrurus_browni |  | https://guatemala.inaturalist.org/taxa/30606-Micrurus-bernadi |  |
| *Micrurus bocourti* | https://www.reptilesofecuador.com/micrurus_bocourti_photos.html |  | https://www.inaturalist.org/taxa/30603-Micrurus-bocourti |  |
| *Micrurus boicora* | https://reptile-database.reptarium.cz/species?genus=Micrurus&species=boicora | https://conexaoplaneta.com.br/blog/tag/micrurus-boicora/ |  |  |
| *Micrurus brasiliensis* | https://reptile-database.reptarium.cz/species?genus=Micrurus&species=brasiliensis | https://inaturalist.ca/taxa/30565-Micrurus-brasiliensis |  |  |
| *Micrurus browni* | https://reptile-database.reptarium.cz/species?genus=Micrurus&species=browni |  | https://www.inaturalist.org/taxa/30600-Micrurus-browni/browse_photos |  |
| *Micrurus camilae* | https://inaturalist.ca/taxa/30619-Micrurus-camilae |  | https://inaturalist.ca/taxa/30619-Micrurus-camilae |  |
| *Micrurus carvalhoi* | https://www.youtube.com/watch?v=HhGdyVk8XmE |  |  |  |
| *Micrurus circinalis* | https://www.flickr.com/photos/nclarkii/5054554293 | https://inaturalist.ca/taxa/30524-Micrurus-circinalis |  |  |
| *Micrurus clarki* | https://reptile-database.reptarium.cz/species?genus=Micrurus&species=clarki |  | https://icp.ucr.ac.cr/en/information-and-materials/venomous-snakes-costa-rica/micrurus-clarki |  |
| *Micrurus collaris* | https://www.bio-scene.org/media/micrurus-collaris-1 |  | https://www.bio-scene.org/article/fiche-micrurus-collaris |  |
| *Micrurus corallinus* | https://reptile-database.reptarium.cz/species?genus=Micrurus&species=corallinus |  | https://en.wikipedia.org/wiki/Micrurus_corallinus |  |
| *Micrurus decoratus* | https://www.flickr.com/photos/sickilla/7015498465 |  | https://reptile-database.reptarium.cz/species?genus=Micrurus&species=decoratus |  |
| *Micrurus diana* | https://uk.inaturalist.org/taxa/30590-Micrurus-diana/browse_photos |  |  |  |
| *Micrurus diastema* | https://reptile-database.reptarium.cz/species?genus=Micrurus&species=diastema |  | https://en.wikipedia.org/wiki/Micrurus_diastema |  |
| *Micrurus dissoleucus* | https://reptile-database.reptarium.cz/species?genus=Micrurus&species=dissoleucus |  | https://inaturalist.ca/taxa/30583-Micrurus-dissoleucus |  |
| *Micrurus distans* | https://inaturalist.ca/taxa/30578-Micrurus-distans |  | https://csvcoll.org/portal/taxa/index.php?taxauthid=1&taxon=585944&clid=23 |  |
| *Micrurus diutius* | https://herpetologytt.blogspot.com/2016/08/trinidad-ribbon-coral-snake-micrurus.html |  | https://www.inaturalist.org/taxa/1223343-Micrurus-diutius |  |
| *Micrurus dumerilii* | https://reptile-database.reptarium.cz/species?genus=Micrurus&species=dumerilii |  | https://www.inaturalist.org/taxa/115846-Micrurus-dumerilii-antioquiensis |  |
| *Micrurus elegans* | https://calphotos.berkeley.edu/cgi/img_query?enlarge=0000+0000+1114+0944 | https://www.inaturalist.org/taxa/30573-Micrurus-elegans/browse_photos |  |  |
| *Micrurus ephippifer* | https://www.inaturalist.org/taxa/30570-Micrurus-ephippifer |  | https://www.inaturalist.org/taxa/30570-Micrurus-ephippifer |  |
| *Micrurus filiformis* | https://reptile-database.reptarium.cz/species?genus=Micrurus&species=filiformis |  | https://inaturalist.ca/taxa/30568-Micrurus-filiformis |  |
| *Micrurus frontalis* | https://reptile-database.reptarium.cz/species?genus=Micrurus&species=frontalis |  | https://reptile-database.reptarium.cz/species?genus=Micrurus&species=frontalis |  |
| *Micrurus frontifasciatus* | https://www.naturepl.com/stock-photo-coral-snake-micrurus-frontifasciatus-andes-semi-desert-at-3300-metres-image01038700.html |  | https://eol.org/pages/1055840 |  |
| *Micrurus fulvius* | https://inaturalist.ca/taxa/73867-Micrurus-fulvius |  | https://inaturalist.ca/taxa/73867-Micrurus-fulvius |  |
| *Micrurus helleri* | http://www.wildherps.com/species/M.lemniscatus.html |  | http://www.wildherps.com/species/M.lemniscatus.html |  |
| *Micrurus hemprichii* | https://reptile-database.reptarium.cz/species?genus=Micrurus&species=hemprichii |  | https://inaturalist.ca/taxa/30560-Micrurus-hemprichii |  |
| *Micrurus hippocrepis* | https://www.inaturalist.org/taxa/30559-Micrurus-hippocrepis |  |  |  |
| *Micrurus ibiboboca* | https://reptile-database.reptarium.cz/species?genus=Micrurus&species=ibiboboca |  | https://inaturalist.ca/taxa/105868-Micrurus-ibiboboca |  |
| *Micrurus isozonus* | https://reptile-database.reptarium.cz/species?genus=Micrurus&species=isozonus |  | https://www.flickr.com/photos/faunacolombianacom/3812183063 |  |
| *Micrurus langsdorffi* | https://reptile-database.reptarium.cz/species?genus=Micrurus&species=langsdorffi |  | https://www.flickr.com/photos/kevinmessenger/12128732963 |  |
| *Micrurus laticollaris* | https://www.inaturalist.org/taxa/30558-Micrurus-laticollaris-maculirostris |  | https://www.flickr.com/photos/lizard_skin/28866007923 |  |
| *Micrurus latifasciatus* | https://inaturalist.ca/taxa/30554-Micrurus-latifasciatus |  |  |  |
| *Micrurus lemniscatus* | https://www.inaturalist.org/taxa/30498-Micrurus-lemniscatus |  | http://www.wildherps.com/species/M.lemniscatus.html |  |
| *Micrurus limbatus* | https://uk.inaturalist.org/taxa/30550-Micrurus-limbatus/browse_photos |  | https://uk.inaturalist.org/taxa/30550-Micrurus-limbatus/browse_photos |  |
| *Micrurus meridensis* | https://reptile-database.reptarium.cz/species?genus=Micrurus&species=meridensis |  |  |  |
| *Micrurus mertensi* | https://www.reptilesofecuador.com/micrurus_mertensi.html |  | https://inaturalist.ca/taxa/30548-Micrurus-mertensi |  |
| *Micrurus mipartitus* | https://en.wikipedia.org/wiki/Micrurus_mipartitus |  | https://icp.ucr.ac.cr/en/information-and-materials/venomous-snakes-costa-rica/micrurus-mipartitus |  |
| *Micrurus mosquitensis* | https://reptile-database.reptarium.cz/species?genus=Micrurus&species=mosquitensis |  | https://reptile-database.reptarium.cz/species?genus=Micrurus&species=mosquitensis |  |
| *Micrurus multifasciatus* | http://www.wildherps.com/species/M.multifasciatus.html | https://reptile-database.reptarium.cz/species?genus=Micrurus&species=multifasciatus |  |  |
| *Micrurus multiscutatus* | https://reptile-database.reptarium.cz/species?genus=Micrurus&species=multiscutatus |  | https://www.reptilesofecuador.com/micrurus_multiscutatus_photos.html |  |
| *Micrurus narduccii* | https://reptile-database.reptarium.cz/species?genus=Micrurus&species=narduccii | https://reptile-database.reptarium.cz/species?genus=Micrurus&species=narduccii | https://www.google.com/url?sa=i&url=https%3A%2F%2Fwww.flickr.com%2Fphotos%2Fkwray%2F16699535422&psig=AOvVaw1OFs35p_eeR2ZVCBf3FnB9&ust=1683509309022000&source=images&cd=vfe&ved=0CBAQjhxqFwoTCJjE4ZSH4v4CFQAAAAAdAAAAABAM | https://uk.inaturalist.org/taxa/30617-Micrurus-narduccii |
| *Micrurus nattereri* | https://inaturalist.ca/taxa/146289-Micrurus-nattereri |  | https://inaturalist.ca/taxa/146289-Micrurus-nattereri |  |
| *Micrurus nebularis* | https://inaturalist.ca/taxa/30542-Micrurus-nebularis |  | https://inaturalist.ca/taxa/30542-Micrurus-nebularis |  |
| *Micrurus nigrocinctus* | https://www.inaturalist.org/taxa/30531-Micrurus-nigrocinctus |  | https://en.wikipedia.org/wiki/Micrurus_nigrocinctus |  |
| *Micrurus obscurus* | https://reptile-database.reptarium.cz/species?genus=Micrurus&species=obscurus |  | https://www.inaturalist.org/taxa/146290-Micrurus-obscurus/browse_photos |  |
| *Micrurus ornatissimus* | https://www.projectnoah.org/spottings/517716002 | https://www.reptilesofecuador.com/micrurus_ornatissimus_photos.html |
| *Micrurus pachecogili* | https://www.naturalista.mx/taxa/30530-Micrurus-pachecogili/browse_photos |  |  |  |
| *Micrurus paraensis* | https://www.researchgate.net/figure/Micrurus-paraensis-MPEG-20867-340-mm-SVL-from-Melgaco-state-of-Para-Brazil-Dorsal_fig2_330966764 |  |  |  |
| *Micrurus peruvianus* | https://reptile-database.reptarium.cz/species?genus=Micrurus&species=peruvianus |  | https://www.alamy.com/the-peruvian-coral-snake-micrurus-peruvianus-is-a-highly-secretive-but-venomous-inhabitant-of-the-jungle-image177815711.html |  |
| *Micrurus potyguara* | https://biofaces.com/specie/2197/micrurus-potyguara |  | https://biofaces.com/specie/2197/micrurus-potyguara |  |
| *Micrurus proximans* | https://reptile-database.reptarium.cz/species?genus=Micrurus&species=proximans |  | https://inaturalist.ca/taxa/30529-Micrurus-proximans |  |
| *Micrurus psyches* | https://www.sciencephoto.com/media/106773/view/carib-coral-snake |  |  |  |
| *Micrurus putumayensis* | https://www.sciencephoto.com/media/1139871/view/sooty-coral-snake |  | https://inaturalist.ca/taxa/105871-Micrurus-putumayensis/browse_photos | https://inaturalist.ca/taxa/105871-Micrurus-putumayensis/browse_photos |
| *Micrurus pyrrhocryptus* | https://reptile-database.reptarium.cz/species?genus=Micrurus&species=tricolor |  | https://inaturalist.ca/taxa/105872-Micrurus-pyrrhocryptus |  |
| *Micrurus remotus* | https://reptile-database.reptarium.cz/species?genus=Micrurus&species=remotus |  | https://www.inaturalist.org/taxa/30493 |  |
| *Micrurus ruatanus* | https://en.wikipedia.org/wiki/Roatan_coral_snake |  | https://reptile-database.reptarium.cz/species?genus=Micrurus&species=ruatanus |  |
| *Micrurus sangilensis* | https://inaturalist.ca/taxa/30521-Micrurus-sangilensis |  | https://inaturalist.ca/taxa/30521-Micrurus-sangilensis |  |
| *Micrurus scutiventris* | https://reptile-database.reptarium.cz/species?genus=Micrurus&species=scutiventris | https://reptile-database.reptarium.cz/species?genus=Micrurus&species=scutiventris |  |  |
| *Micrurus serranus* | https://commons.wikimedia.org/wiki/File:Micrurus_serranus_1.jpg |  | https://www.inaturalist.org/taxa/105873-Micrurus-serranus |  |
| *Micrurus silviae* | https://www.researchgate.net/figure/Photograph-of-the-holotype-of-Micrurus-silviae-CRUPF-1488_fig1_333850685 |  |  |  |
| *Micrurus spixii* | https://reptile-database.reptarium.cz/species?genus=Micrurus&species=spixii |  | https://uk.inaturalist.org/taxa/30517-Micrurus-spixii |  |
| *Micrurus stewarti* | https://reptile-database.reptarium.cz/species?genus=Micrurus&species=stewarti |  | https://www.flickr.com/photos/primevalnature/9716356496 |  |
| *Micrurus surinamensis* | https://reptile-database.reptarium.cz/species?genus=Micrurus&species=surinamensis |  | https://en.wikipedia.org/wiki/Aquatic_coral_snake |  |
| *Micrurus tener* | https://www.inaturalist.org/taxa/30494-Micrurus-tener |  | https://reptile-database.reptarium.cz/species?genus=Micrurus&species=tener |  |
| *Micrurus tikuna* | https://reptile-database.reptarium.cz/species?genus=Micrurus&species=tikuna |  | https://inaturalist.ca/taxa/539989-Micrurus-tikuna |  |
| *Micrurus tricolor* | https://reptile-database.reptarium.cz/species?genus=Micrurus&species=tricolor |  | https://reptile-database.reptarium.cz/species?genus=Micrurus&species=tricolor |  |
| *Micrurus tschudii* | https://reptile-database.reptarium.cz/species?genus=Micrurus&species=tschudii | https://www.flickr.com/photos/kz_yb/24394391598 | https://venomland.forumotion.com/t7124-micrurus-tschudii-feeding |  |
| *Naja anchietae* | https://www.tyroneping.co.za/snakes-southern-africa/naja-anchietae-anchietas-cobra/ |  | https://www.tyroneping.co.za/snakes-southern-africa/naja-anchietae-anchietas-cobra/ |  |
| *Naja annulata* | https://inaturalist.ca/taxa/30456-Naja-annulata/browse_photos |  | https://reptile-database.reptarium.cz/species?genus=Naja&species=annulata | https://vk.com/wall-51398671_136?lang=en |
| *Naja annulifera* | https://exotic-venom.tumblr.com/post/122883478396/naja-annulifera-snouted-cobra-banded-egyptian | https://www.flickr.com/photos/tyroneping/6009803666 | https://calphotos.berkeley.edu/cgi/img_query?enlarge=0000+0000+0211+0366 |
| *Naja arabica* | https://www.youtube.com/watch?v=cVCDE_aeGes | https://www.youtube.com/shorts/Wo8t9dfD5uw |
| *Naja ashei* | https://www.nbcnews.com/id/wbna22148537 | http://novataxa.blogspot.com/2019/04/2007-naja-ashei.html |  |  |
| *Naja atra* | https://www.snakesoftaiwan.com/naja-atra.html | https://www.hongkongsnakeid.com/chinese-cobra | https://www.naturepl.com/stock-photo-chinese-cobra-naja-atra-in-threat-stance-shek-pik-southwestern-coast-nature-image01608542.html | https://reptile-database.reptarium.cz/species?genus=Naja&species=atra |
| *Naja fuxi* | https://passport.weibo.com/visitor/visitor?entry=miniblog&a=enter&url=https%3A%2F%2Fweibo.com%2F1914242474%2FMjOwciVXS%3Ffrom%3Dpage_1005056518988728_profile%26wvr%3D6%26mod%3Dweibotime&domain=weibo.com&ua=Mozilla%2F5.0%20%28Macintosh%3B%20Intel%20Mac%20OS%20X%2010_12_6%29%20AppleWebKit%2F605.1.15%20%28KHTML%2C%20like%20Gecko%29%20Version%2F12.1.2%20Safari%2F605.1.15&_rand=1683381191421&sudaref= | https://www.youtube.com/watch?v=DJPhGX5JXnc | https://baike.baidu.com/item/西南眼镜蛇/62538614 | http://novataxa.blogspot.com/2022/12/naja.html |
| *Naja guineensis* | https://guatemala.inaturalist.org/taxa/797731-Naja-guineensis/browse_photos |  | https://guatemala.inaturalist.org/taxa/797731-Naja-guineensis/browse_photos |  |
| *Naja haje* | https://reptile-database.reptarium.cz/species?genus=Naja&species=haje | https://reptile-database.reptarium.cz/species?genus=Naja&species=haje |
| *Naja kaouthia* | https://www.flickr.com/photos/hghjim/8739324310 |  | https://stock.adobe.com/ca/images/snake-siamese-cobra-naja-kaouthia-on-the-green-grass/227080791 |  |
| *Naja katiensis* | https://www.inaturalist.org/taxa/30490-Naja-katiensis/browse_photos | https://www.inaturalist.org/taxa/30490-Naja-katiensis/browse_photos | https://www.tumblr.com/exotic-venom/124709763268/naja-katiensis-mali-cobra-mainly-terrestrial |  |
| *Naja mandalayensis* | https://inaturalist.ca/taxa/30491-Naja-mandalayensis/browse_photos | https://inaturalist.ca/taxa/30491-Naja-mandalayensis/browse_photos |  |  |
| *Naja melanoleuca* | https://reptile-database.reptarium.cz/species?genus=Naja&species=melanoleuca |  | https://news.mongabay.com/2018/08/africas-biggest-cobra-is-five-species-not-one-study-finds/ |  |
| *Naja mossambica* | https://www.flickr.com/photos/hghjim/8742070613 |  | https://reptile-database.reptarium.cz/species?genus=Naja&species=mossambica |  |
| *Naja naja* | https://en.wikipedia.org/wiki/Naja |  | https://animalia.bio/indian-cobra |  |
| *Naja nana* | https://reptile-database.reptarium.cz/species?genus=Naja&species=nana |  | https://dickiesworlddotcodotuk.wordpress.com/2020/05/20/new-species-of-semi-aquatic-cobra-described-from-the-democratic-republic-of-the-congo/ | http://www.reptiles4all.com/media/a634af6c-44b2-4bb2-bdd1-f3fc0b2f560e-congo-dwarf-water-cobra-naja-nana |
| *Naja nigricincta* | https://calphotos.berkeley.edu/cgi/img_query?enlarge=0000+0000+0315+2288 |  | https://calphotos.berkeley.edu/cgi/img_query?enlarge=0000+0000+0315+2287 |  |
| *Naja nigricollis* | http://animal.memozee.com/view.php?tid=2&did=42262 |  | https://www.reddit.com/r/snakes/comments/wro3cb/not_happy_about_the_move_my_buddy_sent_me_this/ |  |
| *Naja nivea* | https://creatures-of-the-world.fandom.com/wiki/Cape_Cobra | https://nextgenherpetologist.co.za/2017/04/23/cape-cobra-naja-nivea/ | https://stock.adobe.com/au/images/cape-cobra-naja-nivea/260209165 |
| *Naja nubiae* | https://www.flickr.com/photos/hghjim/8746568547 |  | https://www.reddit.com/r/VenomousKeepers/comments/db03sl/naja_nubiae_in_new_enclosure/ | https://www.flickr.com/photos/hghjim/8746568719 |
| *Naja oxiana* | https://thesnakeguide.com/caspian-cobra/ |  | https://calphotos.berkeley.edu/cgi/img_query?enlarge=0000+0000+0511+1572 |  |
| *Naja pallida* | https://dangerousanimals.fandom.com/wiki/Red_Spitting_Cobra | https://ferrebeekeeper.wordpress.com/2011/10/13/the-red-spitting-cobra/ |  |  |
| *Naja philippinensis* | https://calphotos.berkeley.edu/cgi/img_query?enlarge=0000+0000+0106+0929 |  | https://owlcation.com/stem/The-Philippine-Cobra |  |
| *Naja sagittifera* | https://en.wikipedia.org/wiki/Andaman_cobra |  | https://reptile-database.reptarium.cz/species?genus=Naja&species=sagittifera |  |
| *Naja samarensis* | https://www.reptilefact.com/southern-philippine-cobra.html |  | https://www.flickr.com/photos/hghjim/8232891620 |  |
| *Naja savannula* | https://www.inaturalist.org/taxa/797732-Naja-savannula/browse_photos | https://www.inaturalist.org/taxa/797732-Naja-savannula/browse_photos | https://www.inaturalist.org/taxa/797732-Naja-savannula/browse_photos | https://www.inaturalist.org/taxa/797732-Naja-savannula/browse_photos |
| *Naja senegalensis* | https://www.researchgate.net/figure/Adult-specimen-of-Naja-senegalensis-from-near-Bamako-Mali-photographed-at-the-house-of_fig8_228655725 | https://www.jeroenverhoeff.com/2006/12/01/senegal-and-gambia-2006-trip-report/olympus-digital-camera-58/ |  |  |
| *Naja siamensis* | https://www.flickr.com/photos/hghjim/2965344640 | https://www.pinterest.ca/pin/indochinese-cobra-naja-siamensis--5911043232523254/ | https://www.en.siam-info.de/venomous_animals/snakes/naja.html | https://www.reddit.com/r/snakes/comments/d5g8hh/naja_siamensis_indochinese_spitting_cobra_this/ |
| *Naja sputatrix* | https://en.wikipedia.org/wiki/Javan_spitting_cobra |  | https://inaturalist.ca/taxa/30482-Naja-sputatrix |  |
| *Naja subfulva* | https://www.researchgate.net/figure/Naja-Boulengerina-subfulva-Variation-in-colour-and-pattern-Top-left-specimen-from_fig8_326736093 |  | https://www.tyroneping.co.za/snakes-southern-africa/naja-subfulva-eastern-forest-cobra/ |  |
| *Naja sumatrana* | https://en.wikipedia.org/wiki/Equatorial_spitting_cobra | https://inaturalist.ca/taxa/106451-Naja-sumatrana |
| *Neelaps bimaculatus* | https://inaturalist.ca/taxa/1250098-Neelaps-bimaculatus/browse_photos |  | https://inaturalist.ca/taxa/1250098-Neelaps-bimaculatus/browse_photos |  |
| *Neelaps calonotos* | https://inaturalist.ca/taxa/318362-Neelaps | https://reptile-database.reptarium.cz/species?genus=Neelaps&species=calonotos&search_param=%28%29 | https://museum.wa.gov.au/explore/articles/meet-black-striped-snake |  |
| *Notechis scutatus* | https://www.shutterstock.com/search/notechis | https://www.pinterest.com/pin/411727590926234021/ | https://www.flickr.com/photos/jason_sulda/33074503391 |
| *Ophiophagus hannah* | https://indiabiodiversity.org/species/show/238894 |  | https://en.wikipedia.org/wiki/King_cobra#/media/File:12_-_The_Mystical_King_Cobra_and_Coffee_Forests.jpg |  |
| *Oxyuranus microlepidotus* | https://reptile-database.reptarium.cz/species?genus=Oxyuranus&species=microlepidotus | https://australian.museum/learn/animals/reptiles/inland-taipan/ | https://www.shutterstock.com/search/taipan | http://repfocus.dk/natureswindow/Reptilia/Oxyuranus_microlepidotus.html |
| *Oxyuranus scutellatus* | https://stock.adobe.com/ca/images/coastal-taipan-oxyuranus-scutellatus/44477986 | https://www.google.com/url?sa=i&url=https%3A%2F%2Fearth-and-space-news.blogspot.com%2F2014%2F07%2Fcoastal-taipan-natural-history.html&psig=AOvVaw1eaMYG0GEzmtnhhXehTHZ4&ust=1683504405234000&source=images&cd=vfe&ved=0CBAQjhxqFwoTCIjc3O304f4CFQAAAAAdAAAAABAJ | http://coolcompanions.com.au/blog/coastal-taipan-2 | http://animal.memozee.com/view.php?tid=3&did=20387 |
| *Oxyuranus temporalis* | https://www.vetlexicon.com/treat/equis/illustration/central-ranges-taipan-%28oxyuranus-temporalis%29 | https://reptile-database.reptarium.cz/species?genus=Oxyuranus&species=temporalis | https://reptile-database.reptarium.cz/species?genus=Oxyuranus&species=temporalis |  |
| *Paroplocephalus atriceps* | https://bie.ala.org.au/species/Paroplocephalus+atriceps | https://reptile-database.reptarium.cz/species?genus=Paroplocephalus&species=atriceps | https://www.flickr.com/photos/27897324@N07/15448506953 | https://www.mja.com.au/journal/2013/199/11/paroplocephalus-envenoming-previously-unrecognised-highly-venomous-snake |
| *Pseudechis australis* | http://www.reptilesofaustralia.com/snakes/elapids/paustralis.htm#.ZFZhoi0ZO8U | https://www.zoochat.com/community/media/king-brown-snake-pseudechis-australis.513538/ | https://depositphotos.com/stock-photos/pseudechis-australis.html | https://reptile-database.reptarium.cz/species?genus=Pseudechis&species=australis |
| *Pseudechis butleri* | https://www.inaturalist.org/taxa/35157-Pseudechis-butleri/browse_photos |  | https://reptile-database.reptarium.cz/species?genus=Pseudechis&species=butleri |  |
| *Pseudechis colletti* | https://www.shannonwild.com/image/I0000HJcD_7rPXMw | https://www.natureinstock.com/search/preview/colletts-snake-pseudechis-colletti-juvenile-in-threat-posture-queensland/0_12029551.html |  |  |
| *Pseudechis guttatus* | https://www.youtube.com/watch?v=L2uRyKdiPk8 |  |  |  |
| *Pseudechis papuanus* | https://www.flickr.com/photos/103027574@N04/10177232376 |  |  |  |
| *Pseudechis porphyriacus* | https://commons.wikimedia.org/wiki/File:Red-bellied_Black_Snake_%28Pseudechis_porphyriacus%29_%288397137495%29.jpg | https://biomedicalsciences.unimelb.edu.au/departments/department-of-biochemistry-and-pharmacology/engage/avru/discover/snakes/black-snakes-pseudechis | https://www.flickr.com/photos/96574168@N02/14704478180 | https://www.terraristik.com/tb/buy-and-sell/pseudechis-porphyriacus-for-sale/a939742/ |
| *Pseudechis rossignolii* | https://www.inaturalist.org/taxa/35161-Pseudechis-australis/browse_photos | https://www.inaturalist.org/taxa/35161-Pseudechis-australis/browse_photos |  |  |
| *Pseudechis weigeli* | https://www.alamy.com/pygmy-mulga-snake-pseudechis-weigeli-mitchell-plateau-np-kimberley-western-australia-dangerous-venomous-species-image357505130.html |  | https://www.flickr.com/photos/jasminevink/16161363457 |  |
| *Pseudohaje goldii* | https://inaturalist.ca/taxa/111014-Pseudohaje-goldii/browse_photos | https://www.reptilefact.com/golds-tree-cobra.html |
| *Pseudonaja affinis* | https://thlpp.tumblr.com/post/120198595816/dugite-pseudonaja-affinis-by-chris-hay-via |  | https://reptile-database.reptarium.cz/species?genus=Pseudonaja&species=affinis |  |
| *Pseudonaja aspidorhyncha* | https://www.flickr.com/photos/dan_lynch/5917808663 | https://calphotos.berkeley.edu/cgi/img_query?enlarge=0000+0000+0312+0213 | https://arod.com.au/arod/reptilia/Squamata/Elapidae/Pseudonaja/aspidorhyncha | https://www.flickr.com/photos/gazs_pics/42490840060 |
| *Pseudonaja guttata* | https://www.natureinstock.com/search/preview/speckled-brownsnake-pseudonaja-guttata-male-raising-head-and-flicking-tongue/0_12558343.html |  | https://www.flickr.com/photos/reptileshots/13533914173 |  |
| *Pseudonaja inframacula* | https://www.inaturalist.org/taxa/111068-Pseudonaja-inframacula |  | https://www.flickr.com/photos/126237772@N07/32004456900 |  |
| *Pseudonaja ingrami* | https://www.flickr.com/photos/shaneblackfnq/19988953086 | https://www.flickr.com/photos/shaneblackfnq/15027494935 | https://www.inaturalist.org/taxa/35145-Pseudonaja-ingrami/browse_photos | https://arod.com.au/arod/index.php?scaleCounting=true&analScale=divided&midBody=17&ventral=200&subCaudal=&subCaudalType=Divided&scaleState=Qld&action=Search |
| *Pseudonaja mengdeni* | https://www.flickr.com/photos/27897324@N07/8499576082 | https://www.flickr.com/photos/euprepiosaur/7218819042 | https://biomedicalsciences.unimelb.edu.au/departments/department-of-biochemistry-and-pharmacology/engage/avru/discover/snakes/common-brown-snake |  |
| *Pseudonaja modesta* | https://www.inaturalist.org/taxa/35144-Pseudonaja-modesta/browse_photos | https://reptile-database.reptarium.cz/species?genus=Pseudonaja&species=modesta | http://www.toxinology.com/fusebox.cfm?fuseaction=main.snakes.display&id=SN0531 | https://reptile-database.reptarium.cz/species?genus=Pseudonaja&species=modesta |
| *Pseudonaja nuchalis* | https://inaturalist.ca/taxa/35143-Pseudonaja-nuchalis/browse_photos | https://inaturalist.ca/taxa/35143-Pseudonaja-nuchalis/browse_photos | https://inaturalist.ca/taxa/35143-Pseudonaja-nuchalis/browse_photos |  |
| *Pseudonaja textilis* | https://www.instagram.com/p/Cd3jC52MeMv/ | https://www.britannica.com/animal/brown-snake |
| *Salomonelaps par* | https://www.inaturalist.org/taxa/35132-Salomonelaps-par | https://www.inaturalist.org/taxa/35132-Salomonelaps-par |  |  |
| *Simoselaps anomalus* | https://reptile-database.reptarium.cz/species?genus=Simoselaps&species=anomalus |  | https://www.flickr.com/photos/euprepiosaur/46469532374 |  |
| *Simoselaps bertholdi* | https://reptile-database.reptarium.cz/species?genus=Simoselaps&species=bertholdi |  | https://www.flickr.com/photos/cowyeow/16132592273 |  |
| *Simoselaps littoralis* | https://reptile-database.reptarium.cz/species?genus=Simoselaps&species=littoralis |  |  |  |
| *Sinomicrurus annularis* | https://www.pinterest.ca/pin/mcclellands-coral-snake-sinomicrurus-annularis--13159023881276446/ | https://www.flickr.com/photos/cowyeow/38010915866 |  |  |
| *Sinomicrurus hatori* | https://www.youtube.com/watch?v=-ym5NfoVZGQ | https://calphotos.berkeley.edu/cgi/img_query?enlarge=0000+0000+1117+1833 | https://snakesoftaiwan.com/sinomicrurus-hatori.html |  |
| *Sinomicrurus japonicus* | http://okinawanaturephotography.com/tag/hyan-coral-snake-sinomicrurus-japonicus-japonicus-by-shawn-miller/ | http://okinawanaturephotography.com/tag/hyan-coral-snake-sinomicrurus-japonicus-japonicus-by-shawn-miller/ | https://www.inaturalist.org/taxa/30648-Sinomicrurus-japonicus/browse_photos |  |
| *Sinomicrurus kelloggi* | https://www.facebook.com/amphibian.reptile.conservation.org/photos/a.401066603242076/1263592473656147/?type=3 |  | https://www.flickr.com/photos/cowyeow/31959452373 |  |
| *Sinomicrurus macclellandi* | http://indiansnakes.org/snakedetails/macclelland’s%20coral%20snake |  |  |  |
| *Sinomicrurus sauteri* | https://reptile-database.reptarium.cz/species?genus=Sinomicrurus&species=sauteri | https://reptile-database.reptarium.cz/species?genus=Sinomicrurus&species=sauteri |  |  |
| *Sinomicrurus swinhoei* | https://reptile-database.reptarium.cz/species?genus=Sinomicrurus&species=swinhoei&search_param=%28%28taxon%3D%27snake%27%29%29 | https://reptile-database.reptarium.cz/species?genus=Sinomicrurus&species=swinhoei&search_param=%28%28taxon%3D%27snake%27%29%29 | https://www.google.com/url?sa=i&url=https%3A%2F%2Fwww.snakesoftaiwan.com%2Fsinomicrurus-macclellandi-swinhoei.html&psig=AOvVaw2ilPGm984YwK41WmJjYebT&ust=1684027880328000&source=images&cd=vfe&ved=0CBAQjhxqFwoTCNDkvfGS8f4CFQAAAAAdAAAAABAP |  |
| *Suta dwyeri* | https://www.flickr.com/photos/126237772@N07/27926462478 | https://israel.inaturalist.org/taxa/1127947-Suta-dwyeri | https://reptile-database.reptarium.cz/species?genus=Suta&species=dwyeri |  |
| *Suta fasciata* | https://m.facebook.com/MickFullertonWildlife/videos/773062787041833/?_rdr | https://calphotos.berkeley.edu/cgi/img_query?enlarge=0000+0000+0612+1518 | http://members.iinet.net.au/~bush/rosens.html |  |
| *Suta flagellum* | https://inaturalist.ca/taxa/1127948-Suta-flagellum/browse_photos | https://inaturalist.ca/taxa/1127948-Suta-flagellum/browse_photos | https://inaturalist.ca/taxa/1127948-Suta-flagellum/browse_photos |  |
| *Suta gouldii* | https://www.flickr.com/photos/reptileshots/14706674640 |  | https://reptile-database.reptarium.cz/species?genus=Suta&species=gouldii |  |
| *Suta nigriceps* | https://www.inaturalist.org/taxa/1127951-Suta-nigriceps/browse_photos | https://www.inaturalist.org/taxa/1127951-Suta-nigriceps/browse_photos | https://www.inaturalist.org/taxa/1127951-Suta-nigriceps/browse_photos |  |
| *Suta suta* | https://commons.wikimedia.org/wiki/File:Suta_suta_1_-_Christopher_Watson.jpg |  | https://reptile-database.reptarium.cz/species?genus=Suta&species=suta |  |
| *Toxicocalamus atratus* | https://www.ecologyasia.com/verts/snakes-png/black-forest-snake.htm |  |  |  |
| *Toxicocalamus loriae* | https://vertebrate-zoology.arphahub.com/article/89647/zoom/fig/15/ | https://vertebrate-zoology.arphahub.com/article/89647/zoom/fig/15/ | https://vertebrate-zoology.arphahub.com/article/89647/zoom/fig/15/ | https://vertebrate-zoology.arphahub.com/article/89647/zoom/fig/15/ |
| *Tropidechis carinatus* | https://www.shutterstock.com/search/tropidechis-carinatus | https://australian.museum/learn/animals/reptiles/rough-scaled-snake/ | https://kids.britannica.com/students/article/Rough-scaled-snake/313294 |  |
| *Vermicella annulata* | https://reptile-database.reptarium.cz/species?genus=Vermicella&species=annulata |  | https://www.google.com/url?sa=i&url=https%3A%2F%2Fwww.flickr.com%2Fphotos%2Fjono-dashper%2F51172545007&psig=AOvVaw1GSR-JfCiDEu07Sk4LvaGI&ust=1683475026047000&source=images&cd=vfe&ved=0CBAQjhxqFwoTCMDyv6uH4f4CFQAAAAAdAAAAABAI |  |
| *Vermicella intermedia* | https://reptile-database.reptarium.cz/species?genus=Vermicella&species=intermedia |  |  |  |
| *Vermicella multifasciata* | https://bie.ala.org.au/species/https://biodiversity.org.au/afd/taxa/0f9c65c4-c923-4fa3-ba81-166c8b25ca0a |  | https://www.agefotostock.com/age/en/details-photo/northern-bandy-bandy-vermicella-multifasciata-specialist-feeder-on-blind-snakes-humpty-doo-northern-territory-australia/UIG-961-22-jcw00039 |  |
| *Vermicella parscauda* | https://calphotos.berkeley.edu/cgi/img_query?enlarge=0000+0000+0119+3001 |  | https://www.researchgate.net/figure/Dorsal-and-head-view-of-Vermicella-parscauda-sp-nov-holotype-QM-J95678-Male-collected_fig1_326414078 |  |
| *Vermicella snelli* | https://reptile-database.reptarium.cz/species?genus=Vermicella&species=snelli |  | https://arod.com.au/arod/index.php?q=photographerID%3D32 |  |
| *Vermicella vermiformis* | https://megadiverse.tumblr.com/post/119347657827/worm-like-bandy-bandy-vermicella-vermiformis-by |  | https://inaturalist.ca/taxa/35070-Vermicella-vermiformis |  |
| *Walterinnesia aegyptia* | https://reptile-database.reptarium.cz/species?genus=Walterinnesia&species=aegyptia |  | https://www.alamy.com/stock-photo/walterinnesia-aegyptia.html |  |

**Table S7. Video sources used for the presence of defensive behaviors**

| **Species** | **video URL** |
| --- | --- |
| *Acanthops antarcticus* | https://www.youtube.com/watch?v=XQ4shUO8Jqw |
| *Acanthophs antarcticus* | https://www.youtube.com/watch?v=L1bNaIPxjt4 |
| *Acanthophis antarcticus* | https://www.youtube.com/watch?v=wFM6DuyQyIc |
| *Acanthophis antarcticus* | https://www.youtube.com/watch?v=wU3ek876aXc |
| *Acanthophis antarcticus* | https://www.youtube.com/watch?v=Y0UDKQuTJ5s |
| *Acanthophis pyrrhus* | https://www.youtube.com/shorts/X63Kxzm4TBg |
| *Acanthophis rugosus* | https://www.youtube.com/watch?v=J0e0kmrs_AM |
| *Acanthophis wellsi* | https://www.youtube.com/watch?v=ldLmjCzsVmc |
| *Aipysurus eydouxii* | https://www.youtube.com/watch?v=bT6yiWb0Uko |
| *Aipysurus laevis* | https://www.youtube.com/shorts/RRTPdz40vUs |
| *Aipysurus laevis* | https://www.youtube.com/watch?v=8eTtciy0fok |
| *Aipysurus laevis* | https://www.youtube.com/shorts/ozVFxS7-Epc |
| *Aipysurus laevis* | https://www.youtube.com/shorts/c4zstWePztU |
| *Aipysurus laevis* | https://www.youtube.com/watch?v=puTp-t4HB-c |
| *Antaioserpens albiceps* | https://www.youtube.com/watch?v=Cy6HNE5zWNs |
| *Aspidelaps lubricus* | https://www.youtube.com/watch?v=Yp1fhdkfTaA |
| *Aspidelaps lubricus* | https://www.youtube.com/watch?v=4am1b-LZEEE |
| *Aspidelaps lubricus* | https://www.youtube.com/watch?v=QwNUpbHb7rM |
| *Aspidelaps lubricus* | https://www.youtube.com/watch?v=tgDAhqdZ350 |
| *Aspidelaps lubricus* | https://www.youtube.com/shorts/CQWCahErQA4 |
| *Aspidelaps scutatus* | https://www.youtube.com/shorts/P0nf0eBoA_8 |
| *Aspidelaps scutatus* | https://www.youtube.com/shorts/PD3gQt1tKdA |
| *Aspidelaps scutatus* | https://www.youtube.com/watch?v=rYrQDCll9IY |
| *Aspidelaps scutatus* | https://www.youtube.com/watch?v=VScCiYslXgw |
| *Aspidelaps scutatus* | https://www.youtube.com/watch?v=-L7pz8u3Dbo |
| *Austrelaps labialis* | https://www.youtube.com/watch?v=zO8DDpe76BI |
| *Austrelaps labialis* | https://www.youtube.com/watch?v=X9jt2M43crc |
| *Austrelaps ramsayi* | https://www.youtube.com/shorts/y3mlIAGjuAY |
| *Austrelaps ramsayi* | https://www.youtube.com/watch?v=EDRBwjbYyYE |
| *Austrelaps superbus* | https://www.youtube.com/watch?v=fs-gixDZKTg |
| *Austrelaps superbus* | https://www.youtube.com/watch?v=bxifKdSIhfE |
| *Austrelaps superbus* | https://www.youtube.com/watch?v=usjIe0akPmU |
| *Austrelaps superbus* | https://www.youtube.com/watch?v=51Fy-njursI |
| *Austrelaps superbus* | https://www.youtube.com/watch?v=qyv9IHlUYxA |
| *Brachyurophis australis* | https://www.youtube.com/watch?v=-qqz1wqtYe8 |
| *Brachyurophis australis* | https://www.youtube.com/watch?v=QPvvrR81TIU |
| *Brachyurophis australis* | https://www.youtube.com/watch?v=CfyDZhf5Ykg |
| *Brachyurophis australis* | https://www.youtube.com/watch?v=jW-ol22MvSs |
| *Brachyurophis roperi* | https://twitter.com/alanadelaive/status/1135838696509362181 |
| *Bungarus caeruleus* | https://www.facebook.com/100063868113646/videos/today-while-digging-a-grave-a-common-krait-bungarus-caeruleus-snake-came-out-of-/741070853281859/ |
| *Bungarus caeruleus* | https://www.youtube.com/watch?v=9cqRFTbbRuY |
| *Bungarus caeruleus* | https://www.youtube.com/watch?v=I8eEzc_g5Ls |
| *Bungarus ceylonicus* | https://www.youtube.com/watch?v=syoQ8d8Wink |
| *Bungarus ceylonicus* | https://www.youtube.com/watch?v=I8eEzc_g5Ls |
| *Bungarus ceylonicus* | https://www.youtube.com/watch?v=i1q7Xly_wCk |
| *Bungarus ceylonicus* | https://www.youtube.com/watch?v=wURpo1oXI7Y |
| *Bungarus ceylonicus* | https://www.youtube.com/watch?v=JtLPOWDZM4U |
| *Bungarus fasciatus* | https://www.youtube.com/watch?v=tYG-SzhvTyk |
| *Bungarus fasciatus* | https://www.youtube.com/watch?v=U4RUIW9wqG0 |
| *Bungarus fasciatus* | https://www.youtube.com/watch?v=1ps29Bur4ns |
| *Bungarus fasciatus* | https://www.youtube.com/shorts/gGvatJYmLAg |
| *Bungarus fasciatus* | https://www.youtube.com/watch?v=uVj2WaT-muM |
| *Bungarus flaviceps* | https://www.youtube.com/watch?v=ptmyItml1Ss |
| *Bungarus flaviceps* | https://www.youtube.com/watch?v=5mleGVZgnYE |
| *Bungarus flaviceps* | https://www.youtube.com/watch?v=qUzFBTnPbTo |
| *Bungarus flaviceps* | https://www.youtube.com/watch?v=hl7-loTYPD4 |
| *Bungarus lividus* | https://www.youtube.com/watch?v=YdmRYYSXxaA |
| *Bungarus lividus* | https://www.youtube.com/shorts/BAf0Li-kGWk |
| *Bungarus lividus* | https://www.youtube.com/shorts/YQLfT6XRVhY |
| *Bungarus lividus* | https://www.youtube.com/watch?v=4vkIp4N3rhw |
| *Bungarus lividus* | https://www.youtube.com/watch?v=ScpCoa92ww0 |
| *Bungarus multicinctus* | https://www.youtube.com/watch?v=hggn0Udep7Q |
| *Bungarus multicinctus* | https://www.youtube.com/watch?v=-_MJnpaBi9Y |
| *Bungarus niger* | https://www.youtube.com/results?search_query=Bungarus+niger |
| *Bungarus niger* | https://www.youtube.com/shorts/VHihD4l0rtg |
| *Bungarus niger* | https://www.youtube.com/shorts/LOR_lulcITA |
| *Bungarus niger* | https://www.facebook.com/100063098091300/videos/rescue-and-release-of-highly-venomous-snake/1224940041683640/ |
| *Bungarus walli* | https://www.youtube.com/watch?v=e56xrwTLnYw |
| *Bungarus walli* | https://www.youtube.com/shorts/T9nhpXFifdw |
| *Bungarus walli* | https://www.youtube.com/watch?v=Hb_r9FOlOX8 |
| *Cacophis harriettae* | https://www.youtube.com/watch?v=6wgsuo88-AA |
| *Cacophis harriettae* | https://www.youtube.com/watch?v=5weEeUSgTY0&list=PL0V4WLGAv8PJfK09zHyLVF_tRNjslZ2qZ |
| *Cacophis harriettae* | https://www.youtube.com/watch?v=Kae-ROBDS6A&list=PL0V4WLGAv8PJfK09zHyLVF_tRNjslZ2qZ&index=4 |
| *Cacophis harriettae* | https://www.youtube.com/watch?v=-zP3Avsqosc&list=PL0V4WLGAv8PJfK09zHyLVF_tRNjslZ2qZ&index=6 |
| *Cacophis harriettae* | https://www.youtube.com/watch?v=FPdxqoJYOtk&list=PL0V4WLGAv8PJfK09zHyLVF_tRNjslZ2qZ&index=8 |
| *Cacophis krefftii* | https://www.youtube.com/watch?v=FY6x7sAmBkQ |
| *Cacophis krefftii* | https://www.youtube.com/watch?v=9D59t7ATbVQ |
| *Cacophis squamulosus* | https://www.youtube.com/watch?v=6dOM5teQ_E4 |
| *Cacophis squamulosus* | https://www.youtube.com/watch?v=XyMEvCssGGA |
| *Cacophis squamulosus* | https://www.youtube.com/shorts/4dC2xGLB7Iw |
| *Cacophis squamulosus* | https://www.youtube.com/shorts/K2CDULbK-cg |
| *Calliophis bibroni* | https://www.youtube.com/shorts/8s9afaGH07Y |
| *Calliophis bibroni* | https://www.youtube.com/watch?v=6JwtOuwZeBU |
| *Calliophis bivirgatus* | https://www.youtube.com/watch?v=xMyCm5wlaGE |
| *Calliophis bivirgatus* | https://www.youtube.com/watch?v=7g9h1aF1OtU |
| *Calliophis bivirgatus* | https://www.youtube.com/watch?v=6BGJ9QNlEzo |
| *Calliophis bivirgatus* | https://www.youtube.com/watch?v=XjjsZCrPX8U |
| *Calliophis bivirgatus* | https://www.youtube.com/watch?v=2bPzRwixJj8 |
| *Calliophis intestinalis* | https://www.youtube.com/watch?v=sBIQ5qxwJxE |
| *Calliophis intestinalis* | https://www.youtube.com/watch?v=TOVqTwFJYtM |
| *Calliophis intestinalis* | https://www.youtube.com/watch?v=z5nz_JQzDrc |
| *Calliophis intestinalis* | https://www.youtube.com/watch?v=FwGMvDphMoY |
| *Calliophis intestinalis* | https://www.youtube.com/shorts/2ZOEcAcE1_s |
| *Calliophis maculiceps* | https://www.youtube.com/watch?v=rXW5544K6pE |
| *Calliophis melanurus* | https://www.youtube.com/watch?v=5oAkmy5FRwQ |
| *Calliophis melanurus* | https://www.youtube.com/watch?v=t4OsbTW5qsk |
| *Calliophis melanurus* | https://www.youtube.com/watch?v=iV9no5y1umo |
| *Calliophis melanurus* | https://www.youtube.com/watch?v=YZOeVrnIIjA |
| *Calliophis melanurus* | https://www.youtube.com/watch?v=LpsazjaeBvg |
| *Cryptophis nigrescens* | https://www.youtube.com/watch?v=Lrm41DQXAj8 |
| *Cryptophis nigrescens* | https://www.youtube.com/shorts/zWfp4pYG35A |
| *Cryptophis nigrescens* | https://www.youtube.com/watch?v=ZRI-Fkm9KKc |
| *Cryptophis nigrescens* | https://www.youtube.com/watch?v=qpmz65lBAT0 |
| *Demansia papuensis* | https://m.facebook.com/discoverycoastsnakecatchers/videos/i-got-to-remove-and-relocate-a-papuan-whip-snake-demansia-papuensis-at-work-up-i/371779933658893/?locale=he_IL |
| *Demansia psammophis* | https://www.youtube.com/results?search_query=Demansia+psammophis |
| *Demansia psammophis* | https://www.youtube.com/shorts/oTuV0avnubU |
| *Demansia psammophis* | https://www.youtube.com/shorts/WyrXA65fTtk |
| *Demansia psammophis* | https://www.youtube.com/watch?v=JLwgQBdmVlU |
| *Demansia psammophis* | https://www.youtube.com/watch?v=Ndtl5Vx4NnQ |
| *Demansia quaesitor* | https://vimeo.com/90274019 |
| *Demansia reticulata* | https://www.youtube.com/watch?v=m9lhsnh1pmU |
| *Demansia reticulata* | https://www.youtube.com/watch?v=3MTsHvgMQW0 |
| *Demansia reticulata* | https://ms-my.facebook.com/WesternReptileRemoval/videos/copper-tail-whip-snake-demansia-reticulata-cupreiceps-release-pilbara-region-wa-/3240851366199118/ |
| *Demansia torquata* | https://www.youtube.com/watch?v=xDzRbAUR7Uw |
| *Demansia vestigiata* | https://www.youtube.com/watch?v=sIXAOigYGfo |
| *Demansia vestigiata* | https://www.youtube.com/watch?v=qxgi5kS3w5c |
| *Dendroaspis angusticeps* | https://www.youtube.com/watch?v=uJB2tZzz5x4 |
| *Dendroaspis angusticeps* | https://www.youtube.com/watch?v=TjZki5MCtsI |
| *Dendroaspis angusticeps* | https://www.youtube.com/watch?v=az_1AohpwLU |
| *Dendroaspis angusticeps* | https://www.youtube.com/watch?v=rTOHvCNcaqU |
| *Dendroaspis angusticeps* | https://www.youtube.com/watch?v=rmZ1HExZahU |
| *Dendroaspis jamesoni* | https://www.youtube.com/watch?v=SPg8nbAq2kg |
| *Dendroaspis jamesoni* | https://www.youtube.com/watch?v=MlGXcjcV8Cg |
| *Dendroaspis jamesoni* | https://www.youtube.com/shorts/KqYBrQ5wOYU |
| *Dendroaspis polylepis* | https://www.youtube.com/watch?v=KRVgNhWNZgQ |
| *Dendroaspis polylepis* | https://www.youtube.com/shorts/KbBcPc24oUc |
| *Dendroaspis polylepis* | https://www.youtube.com/watch?v=svLCryez4x0 |
| *Dendroaspis polylepis* | https://www.youtube.com/watch?v=RtNoLUh-cBs |
| *Dendroaspis polylepis* | https://www.youtube.com/watch?v=LZW8xzr-JTQ |
| *Dendroaspis viridis* | https://www.youtube.com/shorts/6uZBSd8Vwn4 |
| *Denisonia maculata* | https://www.youtube.com/watch?v=hpS1u9QQjG8 |
| *Drysdalia coronoides* | https://www.youtube.com/watch?v=QptdjCK-5R0 |
| *Drysdalia coronoides* | https://www.youtube.com/watch?v=SjMwIggCxQs |
| *Drysdalia coronoides* | https://www.youtube.com/watch?v=jidMbKkh04s |
| *Drysdalia coronoides* | https://www.youtube.com/watch?v=iZoKMovBzsw |
| *Drysdalia coronoides* | https://www.youtube.com/watch?v=ZxATRxQywgM |
| *Drysdalia rhodogaster* | https://www.youtube.com/watch?v=4EP45i1_AYg |
| *Drysdalia rhodogaster* | https://www.youtube.com/watch?v=9N9eCrVTxOE |
| *Echiopsis curta* | https://www.youtube.com/watch?v=pW0OjDtcDUA |
| *Echiopsis curta* | https://m.facebook.com/lifeofsiboy/videos/2875373699412865/ |
| *Elapsoidea sundevallii* | https://www.youtube.com/watch?v=uwOvmLMOWQ0 |
| *Elapsoidea sundevallii* | https://www.youtube.com/watch?v=XGxm_bsR5aI |
| *Emydocephalus ijimae* | https://www.youtube.com/watch?v=dVWjcQWioMU |
| *Furina diadema* | https://www.youtube.com/watch?v=4fDE2STUU-k |
| *Furina diadema* | https://www.youtube.com/watch?v=JP7Q3Q00wCo |
| *Furina ornata* | https://www.youtube.com/watch?v=rAHvqr8CmPw |
| *Hemachatus haemachatus* | https://www.youtube.com/watch?v=D8fo59vsOZU |
| *Hemachatus haemachatus* | https://www.youtube.com/watch?v=H_ugRBEsW1U |
| *Hemachatus haemachatus* | https://www.youtube.com/watch?v=uI2cLBvbtW8 |
| *Hemachatus haemachatus* | https://www.youtube.com/shorts/LNn4zESzM04 |
| *Hemachatus haemachatus* | https://www.youtube.com/watch?v=yXndw9BR2-g |
| *Hemiaspis damelii* | https://news.csu.edu.au/latest-news/charles-sturt-study-into-rare-animal-sighting-in-murrumbidgee-wetlands |
| *Hemiaspis signata* | https://www.youtube.com/watch?v=x-eNfeZKMoc |
| *Hemiaspis signata* | https://www.youtube.com/watch?v=jNym2ITO5zk |
| *Hemiaspis signata* | https://www.youtube.com/shorts/c0Th6NWT_RM |
| *Hemiaspis signata* | https://www.youtube.com/watch?v=0HtvQ1bM4jY |
| *Hemiaspis signata* | https://www.youtube.com/watch?v=HVMDyWC1864 |
| *Hemibungarus calligaster* | https://www.youtube.com/watch?v=HFmNkyT9asA |
| *Hemibungarus calligaster* | https://www.youtube.com/watch?v=jp3b9KzfHLs |
| *Hemibungarus calligaster* | https://www.youtube.com/watch?v=83apa-mYr60 |
| *Hemibungarus calligaster* | https://www.youtube.com/watch?v=Ro2MV0IY4gA |
| *Hemibungarus calligaster* | https://www.youtube.com/shorts/VokoZJGGaVY |
| *Homoroselaps lacteus* | https://www.youtube.com/watch?v=t6HD452izLo |
| *Homoroselaps lacteus* | https://www.youtube.com/shorts/KZQ9_MYbiOk |
| *Homoroselaps lacteus* | https://www.youtube.com/watch?v=JXgx9lhkjzI |
| *Homoroselaps lacteus* | https://www.youtube.com/watch?v=14BMd-_kKXA |
| *Homoroselaps lacteus* | https://www.youtube.com/watch?v=kJmToTa3r1k |
| *Hoplocephalus stephensii* | https://www.youtube.com/watch?v=HRhgYeL76qw |
| *Hoplocephalus stephensii* | https://www.youtube.com/watch?v=-s7d8dGbJU8 |
| *Hoplocephalus stephensii* | https://www.youtube.com/watch?v=_Au18Fer6N8 |
| *Hydrophis belcheri* | https://www.youtube.com/watch?v=EhL0kdC6nsA |
| *Hydrophis brookii* | https://www.youtube.com/watch?v=I0CmPExGjA0 |
| *Hydrophis cyanocinctus* | https://www.youtube.com/watch?v=Ze5giICN_hI |
| *Hydrophis cyanocinctus* | https://www.youtube.com/watch?v=hN-87dq2pJY |
| *Hydrophis elegans* | https://www.youtube.com/watch?v=ZtD9DvgKNYE |
| *Hydrophis elegans* | https://www.youtube.com/watch?v=2OwVWQEA4H4 |
| *Hydrophis elegans* | https://www.youtube.com/watch?v=EXYevKfx0VI |
| *Hydrophis elegans* | https://www.youtube.com/watch?v=xjnACECD-jE |
| *Hydrophis hardwickii* | https://www.youtube.com/watch?v=vIQ6eqN9T9A |
| *Hydrophis major* | https://www.scienceinpublic.com.au/media-releases/citizen-science-project-in-new-caledonia |
| *Hydrophis peronii* | https://m.facebook.com/AustralianSeabirdRescueInc/videos/success-story-thanks-to-bluebaydivers-volunteers-phil-and-carolyn-had-the-pleasu/3007162009408754/?_se_imp=0JyKnUu1CpvLhJRU6 |
| *Hydrophis platurus* | https://www.youtube.com/watch?v=_Ee6ba8Jh30 |
| *Hydrophis platurus* | https://www.youtube.com/shorts/8NkKjRneoX0 |
| *Hydrophis platurus* | https://www.youtube.com/watch?v=QzBqjiF8RC8 |
| *Hydrophis platurus* | https://www.youtube.com/watch?v=ElR8D-aiezM |
| *Hydrophis platurus* | https://www.youtube.com/watch?v=3lr7H7wm2tU |
| *Hydrophis stokesii* | https://www.facebook.com/ArcticFreediver/videos/stokes-sea-snake-with-the-longest-fangs-of-marine-snakes-which-is-even-capable-t/1333965806958304/ |
| *Laticauda colubrina* | https://www.youtube.com/watch?v=djnnZrr1YKU |
| *Laticauda colubrina* | https://www.youtube.com/watch?v=IgD0dslQDsk |
| *Laticauda colubrina* | https://www.youtube.com/watch?v=emtnnXUekmY |
| *Laticauda colubrina* | https://www.youtube.com/watch?v=xq9XKp6C_Ys |
| *Laticauda laticaudata* | https://www.youtube.com/watch?v=UWCgkRMJuVs |
| *Laticauda laticaudata* | https://www.youtube.com/watch?v=mzcKwg8O4a8 |
| *Laticauda saintgironsi* | https://www.youtube.com/watch?v=WXMx-0D8nbc |
| *Laticauda schistorhyncha* | https://www.youtube.com/watch?v=EdwleQtueEo |
| *Laticauda schistorhyncha* | https://www.youtube.com/watch?v=50DSD8qvwSc |
| *Laticauda schistorhyncha* | https://www.youtube.com/watch?v=Q7pkazXvUG4 |
| *Laticauda semifasciata* | https://www.youtube.com/watch?v=n1OCqT7iQKs |
| *Laticauda semifasciata* | https://www.youtube.com/watch?v=A2qBcY_Vg7Q |
| *Micropechis ikaheca* | https://www.youtube.com/watch?v=Yguh_gFbToc |
| *Micropechis ikaheca* | https://www.youtube.com/shorts/lNb4kcuc8fo |
| *Micropechis ikaheca* | https://www.youtube.com/shorts/lNb4kcuc8fo |
| *Micruroides euryxanthus* | https://www.youtube.com/watch?v=3Uuw8D7VIoc |
| *Micruroides euryxanthus* | https://www.youtube.com/watch?v=4NTkj70Kfok |
| *Micruroides euryxanthus* | https://www.youtube.com/watch?v=5-H2_Jr3lGM |
| *Micruroides euryxanthus* | https://www.youtube.com/watch?v=2wWK4i9vU3E |
| *Micruroides euryxanthus* | https://www.youtube.com/watch?v=p5bp2ignWlU |
| *Micrurus alleni* | https://www.youtube.com/watch?v=6OIzGi835-o |
| *Micrurus alleni* | https://www.youtube.com/watch?v=6rlg_KDCz6s |
| *Micrurus altirostris* | https://www.youtube.com/watch?v=nu3JzDYtlAQ |
| *Micrurus altirostris* | https://www.youtube.com/shorts/lbs_gOXh_o4 |
| *Micrurus altirostris* | https://www.youtube.com/watch?v=tOq_h2qXe3k |
| *Micrurus altirostris* | https://www.youtube.com/watch?v=dKF5a1RNt9Q |
| *Micrurus altirostris* | https://www.youtube.com/shorts/xZZpVg_FYks |
| *Micrurus carvalhoi* | https://www.youtube.com/watch?v=HhGdyVk8XmE |
| *Micrurus circinalis* | https://www.youtube.com/watch?v=Q5NpcKDj26s |
| *Micrurus corallinus* | https://www.youtube.com/shorts/kU9Ro4td3Ts |
| *Micrurus corallinus* | https://www.youtube.com/watch?v=1Ob5UX-jXx0 |
| *Micrurus corallinus* | https://www.youtube.com/shorts/W39Mqc-sRAo |
| *Micrurus corallinus* | https://www.youtube.com/watch?v=iHAIZ8QxKpw |
| *Micrurus corallinus* | https://www.youtube.com/watch?v=zkk4Y6rzMHU |
| *Micrurus diastema* | https://www.youtube.com/watch?v=TIWe4at0CCY |
| *Micrurus diastema* | https://www.youtube.com/watch?v=748shZuObIs |
| *Micrurus diastema* | https://www.youtube.com/watch?v=Hq19i-kBaFw |
| *Micrurus dissoleucus* | https://www.youtube.com/watch?v=yseiTsQZtbY |
| *Micrurus dissoleucus* | https://www.youtube.com/shorts/S3Z4n96EPlI |
| *Micrurus distans* | https://www.youtube.com/watch?v=K8L-rBVzN1I |
| *Micrurus fulvius* | https://www.youtube.com/shorts/wxY4ecqD2l8 |
| *Micrurus fulvius* | https://www.youtube.com/shorts/N0pLETSPYXA |
| *Micrurus fulvius* | https://www.youtube.com/watch?v=AZdBjV-dZyE |
| *Micrurus fulvius* | https://www.youtube.com/shorts/VCKDKt3_K-8 |
| *Micrurus fulvius* | https://www.youtube.com/shorts/ctcKTcuKExo |
| *Micrurus helleri* | https://www.youtube.com/watch?v=NLmEKr450OU |
| *Micrurus ibiboboca* | https://www.youtube.com/watch?v=7TRqV51vRw4 |
| *Micrurus ibiboboca* | https://www.youtube.com/shorts/7ox3mcp2gLY |
| *Micrurus ibiboboca* | https://www.youtube.com/watch?v=XoPq8OFVxyo |
| *Micrurus ibiboboca* | https://www.youtube.com/watch?v=wPaZgJoK9XA |
| *Micrurus ibiboboca* | https://www.youtube.com/watch?v=Kqb2mLUMlmk |
| *Micrurus isozonus* | https://www.youtube.com/watch?v=D1uRum0MbEw |
| *Micrurus lemniscatus* | https://www.youtube.com/watch?v=oHhZbNuKTLs |
| *Micrurus mertensi* | https://www.youtube.com/watch?v=_7Y9vN3LZtc |
| *Micrurus mipartitus* | https://www.youtube.com/watch?v=8Be22eu8INY |
| *Micrurus mipartitus* | https://www.youtube.com/watch?v=_bP5t3VvxDU |
| *Micrurus mipartitus* | https://www.youtube.com/watch?v=BTU_ibou3qY |
| *Micrurus mipartitus* | https://www.youtube.com/watch?v=ExuQjHZrG1Q |
| *Micrurus mipartitus* | https://www.youtube.com/watch?v=L2X1DgO4zJ8 |
| *Micrurus mosquitensis* | https://www.youtube.com/watch?v=ODSexlZ2khA |
| *Micrurus mosquitensis* | https://www.youtube.com/watch?v=fSQ81dDYIYA |
| *Micrurus nigrocinctus* | https://www.youtube.com/watch?v=AgwF2Uo4Wmw |
| *Micrurus nigrocinctus* | https://www.youtube.com/watch?v=AnGS8pzVKCU |
| *Micrurus nigrocinctus* | https://www.youtube.com/watch?v=EEO5hVWn-S8 |
| *Micrurus nigrocinctus* | https://www.youtube.com/shorts/A26sVFnO9Kw |
| *Micrurus sangilensis* | https://www.facebook.com/CorporacionAutonomaDeSantanderCAS/videos/una-serpiente-identificada-como-micrurus-sangilensis-o-coral-sangile%C3%B1a-fue-halla/803507604364051/ |
| *Micrurus surinamensis* | https://www.youtube.com/watch?v=rj5OTnirM7g |
| *Micrurus surinamensis* | https://www.youtube.com/watch?v=_ex_SDPuzzo |
| *Micrurus surinamensis* | https://www.youtube.com/watch?v=giMtQe7HMck |
| *Micrurus surinamensis* | https://www.youtube.com/watch?v=5Wv0ZcHUjjw |
| *Micrurus surinamensis* | https://www.youtube.com/shorts/0-SYGCaaolg |
| *Micrurus tener* | https://www.youtube.com/watch?v=ztwHUgwdZx0 |
| *Micrurus tener* | https://www.youtube.com/shorts/P5gjgZJORJY |
| *Micrurus tener* | https://www.youtube.com/watch?v=4-ii8dvX7Mc |
| *Micrurus tener* | https://www.youtube.com/shorts/SR8qiEDqrDo |
| *Micrurus tener* | https://www.youtube.com/watch?v=eTRmjkFwKBE |
| *Naja anchietae* | https://www.youtube.com/watch?v=c0B7gBjViHw |
| *Naja anchietae* | https://www.youtube.com/shorts/sJL_irsy5NE |
| *Naja anchietae* | https://www.youtube.com/watch?v=tDGdTMRR9bo |
| *Naja anchietae* | https://www.youtube.com/watch?v=-vtOsBY1dDI |
| *Naja anchietae* | https://www.youtube.com/watch?v=MZ0IuGaY5Mo |
| *Naja annulata* | https://www.youtube.com/shorts/DJOSI5eyA-0 |
| *Naja annulifera* | https://www.youtube.com/watch?v=QjMBjjVBeO4 |
| *Naja annulifera* | https://www.youtube.com/shorts/0EgoFw-wccM |
| *Naja annulifera* | https://www.youtube.com/watch?v=pktl20Ds81w |
| *Naja annulifera* | https://www.youtube.com/watch?v=rcfXIogijmQ |
| *Naja annulifera* | https://www.youtube.com/watch?v=k5TqRaor-0E |
| *Naja arabica* | https://www.youtube.com/shorts/njotRU5XhWk |
| *Naja arabica* | https://www.youtube.com/shorts/FUUDTNvwrf8 |
| *Naja arabica* | https://www.youtube.com/shorts/mUBpSyWb1Po |
| *Naja arabica* | https://www.youtube.com/shorts/ccIh3-YHOGM |
| *Naja arabica* | https://www.youtube.com/shorts/_7t4eMWmakk |
| *Naja ashei* | https://www.youtube.com/watch?v=9qvm3TGArJU |
| *Naja ashei* | https://www.youtube.com/watch?v=l4K-2MLF2Fk |
| *Naja atra* | https://www.youtube.com/watch?v=c7r_UqDgJN0 |
| *Naja atra* | https://www.youtube.com/watch?v=XIb5Fu5KLas |
| *Naja atra* | https://www.youtube.com/watch?v=3ti_JrT3nK0 |
| *Naja atra* | https://www.youtube.com/shorts/Ki2FTLadNdY |
| *Naja atra* | https://www.youtube.com/watch?v=v3U-Nk21r7o |
| *Naja guineensis* | https://www.youtube.com/shorts/5OKf-jeq7tM |
| *Naja haje* | https://www.youtube.com/watch?v=5u1_pBITRy0 |
| *Naja haje* | https://www.youtube.com/watch?v=VGy2WzZFm0I |
| *Naja haje* | https://www.youtube.com/shorts/hcqdJta1D_w |
| *Naja haje* | https://www.youtube.com/watch?v=-GiFTb4W4NY |
| *Naja haje* | https://www.youtube.com/watch?v=1EP_0BTuRhc |
| *Naja kaouthia* | https://www.youtube.com/watch?v=JSmOq-Dv5iY |
| *Naja kaouthia* | https://www.youtube.com/watch?v=Smof86LKlLM |
| *Naja kaouthia* | https://www.youtube.com/shorts/w3wgZdRV8gs |
| *Naja kaouthia* | https://www.youtube.com/watch?v=sCkzKkpDG4k |
| *Naja kaouthia* | https://www.youtube.com/shorts/0v9htkURxg8 |
| *Naja melanoleuca* | https://www.youtube.com/watch?v=x1j_4CMiZJ4 |
| *Naja melanoleuca* | https://www.youtube.com/watch?v=swqJnEYkZoo |
| *Naja melanoleuca* | https://www.youtube.com/watch?v=RMDK7hPAB5o |
| *Naja melanoleuca* | https://www.youtube.com/watch?v=oJkzW_HG_8w |
| *Naja mossambica* | https://www.youtube.com/watch?v=WxjxE1UOJ4A |
| *Naja mossambica* | https://www.youtube.com/watch?v=Tb5GwzYdC9M |
| *Naja mossambica* | https://www.youtube.com/watch?v=1sMEiyLnG0A |
| *Naja mossambica* | https://www.youtube.com/watch?v=PqXHx9-e5ug |
| *Naja mossambica* | https://www.youtube.com/shorts/KcfWM7i7bpU |
| *Naja naja* | https://www.youtube.com/watch?v=rqScF2_sqKY |
| *Naja naja* | https://www.youtube.com/watch?v=FAtt1B62grw |
| *Naja naja* | https://www.youtube.com/watch?v=ygH8dYF2x8M |
| *Naja naja* | https://www.youtube.com/shorts/bSe32rGnUv0 |
| *Naja naja* | https://www.youtube.com/shorts/5TwfkUv3jI0 |
| *Naja nigricincta* | https://www.youtube.com/watch?v=fsk5tz3gKNw |
| *Naja nigricincta* | https://www.youtube.com/shorts/qs5dPkSow8M |
| *Naja nigricincta* | https://www.youtube.com/shorts/_ty4AAgR7vA |
| *Naja nigricincta* | https://www.youtube.com/watch?v=J1rSTLHODaI |
| *Naja nigricincta* | https://www.youtube.com/shorts/oGnsg6UoOIA |
| *Naja nigricollis* | https://www.youtube.com/watch?v=4LZoCEa3TmM |
| *Naja nigricollis* | https://www.youtube.com/shorts/uo5Iymp4Y9Y |
| *Naja nigricollis* | https://www.youtube.com/watch?v=odN5zAmAqUU |
| *Naja nigricollis* | https://www.youtube.com/shorts/_scFEUHbHe0 |
| *Naja nigricollis* | https://www.youtube.com/shorts/bqMfqJ3GlD4 |
| *Naja nivea* | https://www.youtube.com/watch?v=1hyJToBJ3cg |
| *Naja nivea* | https://www.youtube.com/watch?v=Qi7AJbJVpsE |
| *Naja nivea* | https://www.youtube.com/watch?v=RWyOh2r_DLQ |
| *Naja nivea* | https://www.youtube.com/watch?v=cQziJOzX7SU |
| *Naja nivea* | https://www.youtube.com/shorts/JB4Y1zA4YmA |
| *Naja nubiae* | https://www.youtube.com/watch?v=Of6bRY1EFxs |
| *Naja nubiae* | https://www.youtube.com/watch?v=bFj5nDOSD3U |
| *Naja oxiana* | https://www.youtube.com/watch?v=lTY7Ka_7TJI |
| *Naja oxiana* | https://www.youtube.com/shorts/v_fp3s_ccB0 |
| *Naja oxiana* | https://www.youtube.com/shorts/N0Dpxf9d628 |
| *Naja oxiana* | https://www.youtube.com/watch?v=M3S5KSjUn0s |
| *Naja pallida* | https://www.youtube.com/watch?v=xfxADhl7gbw |
| *Naja pallida* | https://www.youtube.com/watch?v=WUBfI_UAVq0 |
| *Naja pallida* | https://www.youtube.com/shorts/fQzXu4Sx_Bc |
| *Naja pallida* | https://www.youtube.com/shorts/ExcwxWPDw1w |
| *Naja pallida* | https://www.youtube.com/watch?v=iUftPkYSN1U |
| *Naja philippinensis* | https://www.youtube.com/shorts/2K_jfEKYyBI |
| *Naja philippinensis* | https://www.youtube.com/shorts/2-4nflt0IFY |
| *Naja philippinensis* | https://www.youtube.com/watch?v=33YWH2P-KhE |
| *Naja philippinensis* | https://www.youtube.com/shorts/DN0xd4yi5Kk |
| *Naja samarensis* | https://www.youtube.com/shorts/aqBf4wE3qrw |
| *Naja samarensis* | https://www.youtube.com/watch?v=LTlInN-9TwI |
| *Naja samarensis* | https://www.youtube.com/watch?v=PlnekPpORd0 |
| *Naja samarensis* | https://www.youtube.com/watch?v=_L-gkk2sMt8 |
| *Naja samarensis* | https://www.youtube.com/watch?v=zkE9Pts54Ss |
| *Naja senegalensis* | https://www.youtube.com/shorts/etAR98zV_WI |
| *Naja siamensis* | https://www.youtube.com/watch?v=w2DwK0FA_3Y |
| *Naja siamensis* | https://www.youtube.com/watch?v=b2dTCOWLKCE |
| *Naja siamensis* | https://www.youtube.com/watch?v=GcheeB8rxD8 |
| *Naja siamensis* | https://www.youtube.com/watch?v=QwHPUXPOYiw |
| *Naja siamensis* | https://www.youtube.com/watch?v=ttJ3wpxomGg |
| *Naja sputatrix* | https://www.youtube.com/watch?v=j_tDMHGD0nA |
| *Naja sputatrix* | https://www.youtube.com/watch?v=7oDrpffRBaY |
| *Naja sputatrix* | https://www.youtube.com/shorts/V8UIyXX9fNw |
| *Naja sputatrix* | https://www.youtube.com/shorts/g2BXbRDUVn8 |
| *Naja sputatrix* | https://www.youtube.com/watch?v=q9yyCbzASuQ |
| *Naja subfulva* | https://www.youtube.com/shorts/eBtxvSpU_AU |
| *Naja subfulva* | https://www.youtube.com/watch?v=XQJsDLtKOFU |
| *Naja subfulva* | https://www.youtube.com/watch?v=BbZ74GT_PFc |
| *Naja subfulva* | https://www.youtube.com/results?search_query=Naja+subfulva |
| *Naja subfulva* | https://www.youtube.com/watch?v=COZSQdHSOoA |
| *Naja sumatrana* | https://www.youtube.com/watch?v=9Nrb8ne13iA |
| *Naja sumatrana* | https://www.youtube.com/watch?v=ADwgDTb44Nw |
| *Naja sumatrana* | https://www.youtube.com/shorts/qkbU1kxCP1c |
| *Naja sumatrana* | https://www.youtube.com/shorts/LQq_6R6m94E |
| *Naja sumatrana* | https://www.youtube.com/shorts/R9yJ7UVFgZg |
| *Neelaps bimaculatus* | https://www.tiktok.com/@thesnakespot/video/7189605555227446530 |
| *Notechis scutatus* | https://www.youtube.com/watch?v=1crMh34v4f8 |
| *Notechis scutatus* | https://www.youtube.com/shorts/Clm1_kbEASQ |
| *Notechis scutatus* | https://www.youtube.com/watch?v=PAzS_kmE6d0 |
| *Notechis scutatus* | https://www.youtube.com/watch?v=v-87IyMyZGE |
| *Notechis scutatus* | https://www.youtube.com/shorts/ZH-GHmGG5q4 |
| *Ophiophagus hannah* | https://www.youtube.com/watch?v=mX6izlS_Gjk |
| *Ophiophagus hannah* | https://www.youtube.com/watch?v=5pQZZwt5rx4 |
| *Ophiophagus hannah* | https://www.youtube.com/watch?v=VxWJUlftcNc |
| *Ophiophagus hannah* | https://www.youtube.com/shorts/jJI4EBAB40A |
| *Ophiophagus hannah* | https://www.youtube.com/shorts/WFN6J1n-s7c |
| *Oxyuranus microlepidotus* | https://www.youtube.com/watch?v=HXh0rLQPK5g |
| *Oxyuranus microlepidotus* | https://www.youtube.com/shorts/UBb0SzVUSbE |
| *Oxyuranus microlepidotus* | https://www.youtube.com/shorts/lZLqS9AacMk |
| *Oxyuranus scutellatus* | https://www.youtube.com/watch?v=XrYWSHaGxNc |
| *Oxyuranus scutellatus* | https://www.youtube.com/watch?v=ctc3rl4UyY0 |
| *Oxyuranus scutellatus* | https://www.youtube.com/watch?v=ZUQbShr8AVs |
| *Oxyuranus scutellatus* | https://www.youtube.com/watch?v=FoegDb2M18Y |
| *Pseudechis australis* | https://www.youtube.com/watch?v=Of2NHg1dvpw |
| *Pseudechis australis* | https://www.youtube.com/watch?v=8phqmmrbrxU |
| *Pseudechis australis* | https://www.youtube.com/watch?v=8phqmmrbrxU |
| *Pseudechis australis* | https://www.youtube.com/watch?v=yX0mA6ogZOA |
| *Pseudechis australis* | https://www.youtube.com/watch?v=xCnEBB7Pqf8 |
| *Pseudechis colletti* | https://www.youtube.com/watch?v=96msAqsyBic |
| *Pseudechis colletti* | https://www.youtube.com/watch?v=V6iVifCv6ss |
| *Pseudechis colletti* | https://www.youtube.com/watch?v=rRy5TN1iqw4 |
| *Pseudechis guttatus* | https://www.youtube.com/watch?v=L2uRyKdiPk8 |
| *Pseudechis porphyriacus* | https://www.youtube.com/watch?v=-tz6OfMlr58 |
| *Pseudechis porphyriacus* | https://www.youtube.com/shorts/NmXxohH5li0 |
| *Pseudechis porphyriacus* | https://www.youtube.com/watch?v=1kC4LkGnZec |
| *Pseudechis porphyriacus* | https://www.youtube.com/shorts/k2ZXxA4_3LE |
| *Pseudechis porphyriacus* | https://www.youtube.com/watch?v=bKzTn-6kUAQ |
| *Pseudonaja affinis* | https://www.youtube.com/watch?v=7SI31QRoKP8 |
| *Pseudonaja affinis* | https://www.youtube.com/watch?v=uHYWOze5xA4 |
| *Pseudonaja affinis* | https://www.youtube.com/shorts/u4XR2VvCA-g |
| *Pseudonaja affinis* | https://www.youtube.com/watch?v=4WXCJDrydWc |
| *Pseudonaja affinis* | https://www.youtube.com/watch?v=uaZw81lpr8w |
| *Pseudonaja aspidorhyncha* | https://www.youtube.com/watch?v=EzL32nuMgeI |
| *Pseudonaja guttata* | https://www.youtube.com/watch?v=q_v1n3RO4BE |
| *Pseudonaja ingrami* | https://www.youtube.com/watch?v=RZ5MLOtScI0 |
| *Pseudonaja mengdeni* | https://www.youtube.com/watch?v=INNzP6lRLuY |
| *Pseudonaja mengdeni* | https://www.youtube.com/watch?v=h2-Ty78pnI0 |
| *Pseudonaja mengdeni* | https://www.youtube.com/shorts/PnhW4nbEU3w |
| *Pseudonaja mengdeni* | https://www.youtube.com/watch?v=3jI3yWHd81k |
| *Pseudonaja mengdeni* | https://www.youtube.com/watch?v=eH_cH5wmyDE |
| *Pseudonaja modesta* | https://m.facebook.com/elapidreptileremoval/videos/ringed-brown-snake-pseudonaja-modestavenomous-specie/127891338489865/ |
| *Pseudonaja modesta* | https://ms-my.facebook.com/WesternReptileRemoval/videos/ringed-brown-snake-pseudonaja-modesta-release-venom-rating-potentially-dangerous/807442993562296/ |
| *Pseudonaja nuchalis* | https://www.youtube.com/watch?v=Ez8MB331xkI |
| *Pseudonaja textilis* | https://www.youtube.com/watch?v=FCszL7UHm98 |
| *Pseudonaja textilis* | https://www.youtube.com/shorts/hgZA3vgQTzA |
| *Pseudonaja textilis* | https://www.youtube.com/shorts/nRDonFGzePk |
| *Pseudonaja textilis* | https://www.youtube.com/watch?v=YAxwX1LBns8 |
| *Pseudonaja textilis* | https://www.youtube.com/shorts/TcCoDqQwS3Y |
| *Simoselaps anomalus* | https://www.youtube.com/watch?v=QP5JIzzP_5g |
| *Simoselaps anomalus* | https://www.youtube.com/watch?v=Cv7va29kn38 |
| *Simoselaps bertholdi* | https://www.facebook.com/natural.area.wa/videos/jans-banded-snake-simoselaps-bertholdi-a-burrowing-snake-small-rather-stout-snak/510434286988550/ |
| *Simoselaps bertholdi* | https://www.facebook.com/AWConservancy/videos/this-delightful-jans-banded-snaked-simoselaps-bertholdi-was-found-during-biodive/830622577859198/ |
| *Sinomicrurus hatori* | https://www.youtube.com/watch?v=-ym5NfoVZGQ |
| *Sinomicrurus japonicus* | https://www.youtube.com/watch?v=asLIgecLhRk |
| *Sinomicrurus japonicus* | https://www.youtube.com/watch?v=3omWURM9PrA |
| *Sinomicrurus japonicus* | https://www.youtube.com/watch?v=Iq8RZMGvS4k |
| *Sinomicrurus japonicus* | https://www.youtube.com/shorts/ukx4vmCiTZQ |
| *Sinomicrurus japonicus* | https://www.youtube.com/shorts/DpCrGEhE4Tg |
| *Sinomicrurus macclellandi* | https://www.youtube.com/watch?v=MPm0T4zP-cs |
| *Sinomicrurus macclellandi* | https://www.youtube.com/watch?v=MAHa0QUprTM |
| *Sinomicrurus macclellandi* | https://www.youtube.com/watch?v=SP6s1MLEczQ |
| *Suta dwyeri* | https://www.youtube.com/watch?v=2Y4WqcvlGhY |
| *Suta fasciata* | https://m.facebook.com/MickFullertonWildlife/videos/773062787041833/?_rdr |
| *Suta fasciata* | https://www.tiktok.com/@mick_fullerton_wildlife/video/7108960428864146690 |
| *Suta gouldii* | https://www.youtube.com/shorts/_2v40Ees0vI |
| *Suta gouldii* | https://www.youtube.com/watch?v=DmMYVWPtUHk |
| *Suta gouldii* | https://www.youtube.com/watch?v=Bk8HpXbyX-M |
| *Suta punctata* | https://www.youtube.com/watch?v=8g4d_uACFo4 |
| *Tropidechis carinatus* | https://www.youtube.com/watch?v=-AghsglGlhY |
| *Tropidechis carinatus* | https://www.youtube.com/watch?v=tE2BJmfFNuA |
| *Tropidechis carinatus* | https://www.youtube.com/shorts/rQ58oWBpIoI |
| *Tropidechis carinatus* | https://www.youtube.com/watch?v=-6wcqhQCUog |
| *Tropidechis carinatus* | https://www.youtube.com/watch?v=q9f5RaGOo0U |
| *Vermicella annulata* | https://www.youtube.com/watch?v=Q8U2MnJjJ3Y |
| *Vermicella annulata* | https://www.youtube.com/watch?v=j1Z6O-sICa0 |
| *Vermicella annulata* | https://www.youtube.com/shorts/F23Hd81cefo |
| *Vermicella annulata* | https://www.youtube.com/watch?v=Z8yINYGXwD0 |
| *Vermicella annulata* | https://www.youtube.com/watch?v=PoeOFFp29S4 |
| *Vermicella snelli* | https://www.youtube.com/watch?v=kyxsaZJ4ooI |
| *Walterinnesia aegyptia* | https://www.youtube.com/shorts/VmoC5ldzvjk |
| *Walterinnesia aegyptia* | https://www.youtube.com/watch?v=ERkL1wHFmGI |
| *Walterinnesia morgani* | https://www.youtube.com/watch?v=cMQwpdrHJlo |

**Table S8. Image sources used for photo-based behavioral data acquisition.**

| **Species** | **Main image source** | **Example of behavioral display if present** |
| --- | --- | --- |
| *Acanthophis antarcticus* | https://www.inaturalist.org/ | |
| *Acanthophis hawkei* | https://www.inaturalist.org/ | |
| *Acanthophis laevis* | https://www.inaturalist.org/ | |
| *Acanthophis pyrrhus* | https://www.inaturalist.org/ | |
| *Acanthophis rugosus* | https://www.inaturalist.org/ | |
| *Aipysurus duboisii* | https://www.inaturalist.org/ | |
| *Aipysurus laevis* | https://www.inaturalist.org/ | |
| *Aipysurus tenuis* | https://www.inaturalist.org/ | |
| *Aspidelaps lubricus* | https://www.inaturalist.org/ | https://www.inaturalist.org/observations/52578125 |
| *Aspidelaps scutatus* | https://www.inaturalist.org/ | https://www.inaturalist.org/observations/60593812 |
| *Aspidomorphs muelleri* | https://www.inaturalist.org/ | |
| *Aspidomorphs schlegelii* | https://www.inaturalist.org/ | |
| *Austrelaps labialis* | https://www.inaturalist.org/ | |
| *Austrelaps ramsayi* | https://www.inaturalist.org/ | https://www.inaturalist.org/observations/25030152 |
| *Austrelaps superbus* | https://www.inaturalist.org/ | https://inaturalist.ca/observations/196818974 |
| *Brachyurophisaustralis* | https://www.inaturalist.org/ | |
| *Brachyurophisroperi* | https://www.inaturalist.org/ | |
| *Brachyurophissemifasciatus* | https://www.inaturalist.org/ | |
| *Bungarus andamanensis* | https://www.inaturalist.org/ | |
| *Bungarus candidus* | https://www.inaturalist.org/ | |
| *Bungarus ceylonicus* | https://www.inaturalist.org/ | |
| *Bungarus fasciatus* | https://www.inaturalist.org/ | |
| *Bungarus flaviceps* | https://www.inaturalist.org/ | https://uk.inaturalist.org/observations/195575726 |
| *Bungarus lividus* | https://www.inaturalist.org/ | |
| *Bungarus magnimaculas* | https://www.inaturalist.org/ | |
| *Bungarus multicinctus* | https://www.inaturalist.org/ | |
| *Bungarus niger* | https://www.inaturalist.org/ | |
| *Bungarus sindanus* | https://www.inaturalist.org/ | |
| *Bungarus slowinskii* | https://www.inaturalist.org/ | |
| *Cacophis churchilli* | https://www.inaturalist.org/ | |
| *Cacophis harriettae* | https://www.inaturalist.org/ | |
| *Cacophis krefftii* | https://www.inaturalist.org/ | |
| *Cacophis squamulosus* | https://www.inaturalist.org/ | |
| *Calliophis beddomei* | https://www.inaturalist.org/ | |
| *Calliophis bibroni* | https://www.inaturalist.org/ | |
| *Calliophis bivirgata* | https://www.inaturalist.org/ | |
| *Calliophis castoe* | https://www.inaturalist.org/ | |
| *Calliophis gracilis* | https://www.inaturalist.org/ | https://uk.inaturalist.org/taxa/30424-Calliophis-gracilis/browse_photos |
| *Calliophis haematoetron* | https://www.inaturalist.org/ | https://reptile-database.reptarium.cz/species?genus=Calliophis&species=haematoetron |
| *Calliophis intestinalis* | https://www.inaturalist.org/ | https://inaturalist.ca/observations/105264203 |
| *Calliophis maculiceps* | https://www.inaturalist.org/ | https://www.inaturalist.org/taxa/30413-Calliophis-maculiceps/browse_photos |
| *Calliophis melanurus* | https://www.inaturalist.org/ | https://www.inaturalist.org/taxa/68529-Calliophis-melanurus/browse_photos |
| *Calliophis nigrescens* | https://www.inaturalist.org/ | https://www.inaturalist.org/observations/205064923 |
| *Cryptophis boschmai* | https://www.inaturalist.org/ | |
| *Cryptophis incredibilis* | https://www.inaturalist.org/ | |
| *Cryptophis nigrescens* | https://www.inaturalist.org/ | |
| *Demansia angusticeps* | https://www.inaturalist.org/ | |
| *Demansia olivacea* | https://www.inaturalist.org/ | |
| *Demansia papuensis* | https://www.inaturalist.org/ | |
| *Demansia psammophis* | https://www.inaturalist.org/ | |
| *Demansia quaesitor* | https://www.inaturalist.org/ | |
| *Demansia rufescens* | https://www.inaturalist.org/ | |
| *Demansia simplex* | https://www.inaturalist.org/ | |
| *Demansia vestigiata* | https://www.inaturalist.org/ | |
| *Dendroaspis angusticeps* | https://www.inaturalist.org/ | |
| *Dendroaspis jamesoni* | https://www.inaturalist.org/ | |
| *Dendroaspis polylepis* | https://www.inaturalist.org/ | https://www.inaturalist.org/observations/147129856 |
| *Dendroaspis viridis* | https://www.inaturalist.org/ | |
| *Denisonia devisi* | https://www.inaturalist.org/ | |
| *Denisonia maculata* | https://www.inaturalist.org/ | |
| *Drysdalia coronoides* | https://www.inaturalist.org/ | |
| *Drysdalia rhodogaster* | https://www.inaturalist.org/ | |
| *Echiopsis curta* | https://www.inaturalist.org/ | |
| *Elapognathus coronatus* | https://www.inaturalist.org/ | |
| *Elapognathusminor* | https://www.inaturalist.org/ | |
| *Elapsoidea semiannulata* | https://www.inaturalist.org/ | |
| *Elapsoidea sundevallii* | https://www.inaturalist.org/ | |
| *Emydocephals annulatus* | https://www.inaturalist.org/ | |
| *Emydocephals ijimae* | https://www.inaturalist.org/ | |
| *Furina barnardi* | https://www.inaturalist.org/ | |
| *Furina diadema* | https://www.inaturalist.org/ | |
| *Furina ornata* | https://www.inaturalist.org/ | |
| *Hemachatus haemachatus* | https://www.inaturalist.org/ | https://uk.inaturalist.org/observations/9392146 |
| *Hemiaspis damelii* | https://www.inaturalist.org/ | |
| *Hemiaspis signata* | https://www.inaturalist.org/ | |
| *Hemibungarus calligaster* | https://www.inaturalist.org/ | https://www.inaturalist.org/taxa/73818-Hemibungarus-calligaster |
| *Hoplocephalus bungaroides* | https://www.inaturalist.org/ | |
| *Hoplocephalusbitorquatus* | https://www.inaturalist.org/ | |
| *Hoplocephalusstephensii* | https://www.inaturalist.org/ | |
| *Hydrelaps darwiniensis* | https://www.inaturalist.org/ | |
| *Hydrophis belcheri* | https://www.inaturalist.org/ | |
| *Hydrophis caerulescens* | https://www.inaturalist.org/ | |
| *Hydrophis coggeri* | https://www.inaturalist.org/ | |
| *Hydrophis curtus* | https://www.inaturalist.org/ | |
| *Hydrophis czeblukovi* | https://www.inaturalist.org/ | |
| *Hydrophis elegans* | https://www.inaturalist.org/ | |
| *Hydrophis gracilis* | https://www.inaturalist.org/ | |
| *Hydrophis hardwickii* | https://www.inaturalist.org/ | |
| *Hydrophis lamberti* | https://www.inaturalist.org/ | |
| *Hydrophis macdowelli* | https://www.inaturalist.org/ | |
| *Hydrophis major* | https://www.inaturalist.org/ | |
| *Hydrophis melanocephalus* | https://www.inaturalist.org/ | https://www.inaturalist.org/taxa/35216-Hydrophis-melanocephalus |
| *Hydrophis ornatus* | https://www.inaturalist.org/ | |
| *Hydrophis peronii* | https://www.inaturalist.org/ | |
| *Hydrophis platurus* | https://www.inaturalist.org/ | |
| *Hydrophis schistosus* | https://www.inaturalist.org/ | |
| *Hydrophis spiralis* | https://www.inaturalist.org/ | |
| *Hydrophis stokesii* | https://www.inaturalist.org/ | |
| *Hydrophis viperinus* | https://www.inaturalist.org/ | |
| *Laticauda colubrina* | https://www.inaturalist.org/ | |
| *Laticauda crockeri* | https://www.inaturalist.org/ | |
| *Laticauda frontalis* | https://www.inaturalist.org/ | |
| *Laticauda guineai* | https://www.inaturalist.org/ | |
| *Laticauda laticaudata* | https://www.inaturalist.org/ | |
| *Laticauda saintgironsi* | https://www.inaturalist.org/ | |
| *Laticauda schistorhynchs* | https://www.inaturalist.org/ | |
| *Laticauda semifasciata* | https://www.inaturalist.org/ | |
| *Loveridgelapselapoides* | https://www.inaturalist.org/ | |
| *Micropechis ikaheka* | https://www.inaturalist.org/ | |
| *Micruroides euryxanthus* | https://www.inaturalist.org/ | https://www.inaturalist.org/observations/19445743 |
| *Micrurus alleni* | https://www.inaturalist.org/ | |
| *Micrurus altirostris* | https://www.inaturalist.org/ | https://www.inaturalist.org/photos/62785 |
| *Micrurus ancoralis* | https://www.inaturalist.org/ | |
| *Micrurus annellatus* | https://www.inaturalist.org/ | |
| *Micrurus averyi* | https://www.inaturalist.org/ | |
| *Micrurus baliocoryphus* | https://www.inaturalist.org/ | https://www.inaturalist.org/observations/37248805 |
| *Micrurus bernadi* | https://www.inaturalist.org/ | |
| *Micrurus bocourti* | https://www.inaturalist.org/ | |
| *Micrurus brasiliensis* | https://www.inaturalist.org/ | https://www.inaturalist.org/taxa/30565-Micrurus-brasiliensis |
| *Micrurus browni* | https://www.inaturalist.org/ | |
| *Micrurus camilae* | https://www.inaturalist.org/ | https://www.inaturalist.org/observations/95118968 |
| *Micrurus circinalis* | https://www.inaturalist.org/ | |
| *Micrurus clarki* | https://www.inaturalist.org/ | |
| *Micrurus collaris* | https://www.inaturalist.org/ | https://www.bio-scene.org/media/micrurus-collaris-1 |
| *Micrurus corallinus* | https://www.inaturalist.org/ | https://www.inaturalist.org/observations/56930958 |
| *Micrurus decoratus* | https://www.inaturalist.org/ | https://www.inaturalist.org/taxa/30589-Micrurus-decoratus |
| *Micrurus diana* | https://www.inaturalist.org/ | |
| *Micrurus diastema* | https://www.inaturalist.org/ | |
| *Micrurus dissoleucus* | https://www.inaturalist.org/ | |
| *Micrurus distans* | https://www.inaturalist.org/ | |
| *Micrurus dumerilii* | https://www.inaturalist.org/ | |
| *Micrurus elegans* | https://www.inaturalist.org/ | |
| *Micrurus ephippifer* | https://www.inaturalist.org/ | |
| *Micrurus filiformis* | https://www.inaturalist.org/ | |
| *Micrurus frontalis* | https://www.inaturalist.org/ | https://www.inaturalist.org/observations/41081150 |
| *Micrurus fulvius* | https://www.inaturalist.org/ | |
| *Micrurus hemprichii* | https://www.inaturalist.org/ | https://www.inaturalist.org/observations/199120762 |
| *Micrurus hippocrepis* | https://www.inaturalist.org/ | |
| *Micrurus ibiboboca* | https://www.inaturalist.org/ | https://www.inaturalist.org/observations/198526177 |
| *Micrurus isozonus* | https://www.inaturalist.org/ | |
| *Micrurus langsdorffi* | https://www.inaturalist.org/ | https://www.inaturalist.org/observations/119423805 |
| *Micrurus laticollaris* | https://www.inaturalist.org/ | |
| *Micrurus latifasciatus* | https://www.inaturalist.org/ | |
| *Micrurus lemniscatus* | https://www.inaturalist.org/ | |
| *Micrurus limbatus* | https://www.inaturalist.org/ | |
| *Micrurus meridensis* | https://www.inaturalist.org/ | |
| *Micrurus mertensi* | https://www.inaturalist.org/ | |
| *Micrurus mipartitus* | https://www.inaturalist.org/ | https://inaturalist.ca/observations/48881761 |
| *Micrurus mosquitensis* | https://www.inaturalist.org/ | |
| *Micrurus multifasciatus* | https://www.inaturalist.org/ | https://www.inaturalist.org/taxa/30543-Micrurus-multifasciatus |
| *Micrurus multiscutatus* | https://www.inaturalist.org/ | |
| *Micrurus narduccii* | https://www.inaturalist.org/ | https://www.inaturalist.org/observations/42286407 |
| *Micrurus nattereri* | https://www.inaturalist.org/ | |
| *Micrurus nebularis* | https://www.inaturalist.org/ | |
| *Micrurus nigrocinctus* | https://www.inaturalist.org/ | https://www.inaturalist.org/observations/196681445 |
| *Micrurus obscurus* | https://www.inaturalist.org/ | https://uk.inaturalist.org/taxa/146290-Micrurus-obscurus |
| *Micrurus ornatissimus* | https://www.inaturalist.org/ | https://uk.inaturalist.org/observations/65285762 |
| *Micrurus pachecogili* | https://www.inaturalist.org/ | |
| *Micrurus paraensis* | https://www.inaturalist.org/ | |
| *Micrurus peruvianus* | https://www.inaturalist.org/ | |
| *Micrurus potyguara* | https://www.inaturalist.org/ | https://www.inaturalist.org/observations/180853336 |
| *Micrurus proximans* | https://www.inaturalist.org/ | |
| *Micrurus psyches* | https://www.inaturalist.org/ | |
| *Micrurus putumayensis* | https://www.inaturalist.org/ | https://www.inaturalist.org/observations/150826011 |
| *Micrurus pyrrhocryptus* | https://www.inaturalist.org/ | https://www.inaturalist.org/observations/40126554 |
| *Micrurus remotus* | https://www.inaturalist.org/ | |
| *Micrurus ruatanus* | https://www.inaturalist.org/ | |
| *Micrurus sangilensis* | https://www.inaturalist.org/ | https://www.inaturalist.org/observations/145931406 |
| *Micrurus scutiventris* | https://www.inaturalist.org/ | https://www.inaturalist.org/observations/186673584 |
| *Micrurus serranus* | https://www.inaturalist.org/ | |
| *Micrurus silviae* | https://www.inaturalist.org/ | |
| *Micrurus spixii* | https://www.inaturalist.org/ | https://www.inaturalist.org/observations/148779709 |
| *Micrurus stewarti* | https://www.inaturalist.org/ | |
| *Micrurus surinamensis* | https://www.inaturalist.org/ | |
| *Micrurus tener* | https://www.inaturalist.org/ | |
| *Micrurus tschudii* | https://www.inaturalist.org/ | https://inaturalist.ca/observations/80520707 |
| *Naja anchietae* | https://www.inaturalist.org/ | https://inaturalist.ca/observations/21741953 |
| *Naja annulata* | https://www.inaturalist.org/ | |
| *Naja annulifera* | https://www.inaturalist.org/ | https://inaturalist.ca/observations/148881144 |
| *Naja arabica* | https://www.inaturalist.org/ | https://inaturalist.ca/observations/132022310 |
| *Naja ashei* | https://www.inaturalist.org/ | https://inaturalist.ca/observations/123503222 |
| *Naja atra* | https://www.inaturalist.org/ | https://www.inaturalist.org/observations/26298366 |
| *Naja haje* | https://www.inaturalist.org/ | https://www.inaturalist.org/observations/9439019 |
| *Naja kaouthia* | https://www.inaturalist.org/ | https://www.inaturalist.org/observations/170108742 |
| *Naja katiensis* | https://www.inaturalist.org/ | https://reptile-database.reptarium.cz/species?genus=Naja&species=katiensis |
| *Naja mandalayensis* | https://www.inaturalist.org/ | https://www.inaturalist.org/observations/140250236 |
| *Naja melanoleuca* | https://www.inaturalist.org/ | https://www.inaturalist.org/observations/91839783 |
| *Naja mossambica* | https://www.inaturalist.org/ | https://www.inaturalist.org/observations/151826747 |
| *Naja naja* | https://www.inaturalist.org/ | https://www.inaturalist.org/observations/21469845 |
| *Naja nigricincta* | https://www.inaturalist.org/ | https://www.inaturalist.org/observations/33842350 |
| *Naja nigricollis* | https://www.inaturalist.org/ | https://www.inaturalist.org/observations/25612654 |
| *Naja nivea* | https://www.inaturalist.org/ | https://www.inaturalist.org/observations/23102399 |
| *Naja nubiae* | https://www.inaturalist.org/ | https://uk.inaturalist.org/taxa/106448-Naja-nubiae |
| *Naja oxiana* | https://www.inaturalist.org/ | https://www.inaturalist.org/observations/392258 |
| *Naja pallida* | https://www.inaturalist.org/ | https://www.inaturalist.org/observations/115596237 |
| *Naja philippinensis* | https://www.inaturalist.org/ | https://www.inaturalist.org/observations/65676493 |
| *Naja sagittifera* | https://www.inaturalist.org/ | https://inaturalist.ca/observations/194432445 |
| *Naja samarensis* | https://www.inaturalist.org/ | https://www.inaturalist.org/observations/163475268 |
| *Naja senegalensis* | https://www.inaturalist.org/ | |
| *Naja siamensis* | https://www.inaturalist.org/ | https://www.inaturalist.org/observations/14311106 |
| *Naja sputatrix* | https://www.inaturalist.org/ | https://www.inaturalist.org/observations/36740255 |
| *Naja sumatrana* | https://www.inaturalist.org/ | https://www.inaturalist.org/observations/27181983 |
| *Notechis scutatus* | https://www.inaturalist.org/ | https://inaturalist.ca/observations/47816490 |
| *Ophiophagus hannah* | https://www.inaturalist.org/ | https://www.inaturalist.org/observations/100499731 |
| *Oxyuranus microlepidotus* | https://www.inaturalist.org/ | https://www.inaturalist.org/observations/198112714 |
| *Oxyuranus scutellatus* | https://www.inaturalist.org/ | |
| *Oxyuranus temporalis* | https://www.inaturalist.org/ | |
| *Parasuta dwyeri* | https://www.inaturalist.org/ | |
| *Parasuta flagellum* | https://www.inaturalist.org/ | |
| *Parasuta gouldii* | https://www.inaturalist.org/ | |
| *Parasuta nigriceps* | https://www.inaturalist.org/ | |
| *Paroplocephalus atriceps* | https://www.inaturalist.org/ | |
| *Pseudechis australis* | https://www.inaturalist.org/ | https://www.inaturalist.org/observations/18055588 |
| *Pseudechis butleri* | https://www.inaturalist.org/ | https://www.inaturalist.org/observations/16448943 |
| *Pseudechis colletti* | https://www.inaturalist.org/ | https://uk.inaturalist.org/observations/188521033 |
| *Pseudechis guttatus* | https://www.inaturalist.org/ | https://www.inaturalist.org/observations/154925594 |
| *Pseudechis papuanus* | https://www.inaturalist.org/ | |
| *Pseudechis porphyriacus* | https://www.inaturalist.org/ | https://www.inaturalist.org/observations/61389546 |
| *Pseudechis rossignolii* | https://www.inaturalist.org/ | |
| *Pseudechis weigeli* | https://www.inaturalist.org/ | |
| *Pseudohaje goldii* | https://www.inaturalist.org/ | |
| *Pseudonaja affinis* | https://www.inaturalist.org/ | https://inaturalist.ca/observations/34733775 |
| *Pseudonaja aspidorhyncha* | https://www.inaturalist.org/ | https://www.inaturalist.org/observations/197052388 |
| *Pseudonaja guttata* | https://www.inaturalist.org/ | https://www.inaturalist.org/observations/55878754 |
| *Pseudonaja inframacula* | https://www.inaturalist.org/ | https://www.inaturalist.org/observations/75128147 |
| *Pseudonaja ingrami* | https://www.inaturalist.org/ | https://inaturalist.nz/observations/193443397 |
| *Pseudonaja mengdeni* | https://www.inaturalist.org/ | https://www.inaturalist.org/observations/52138875 |
| *Pseudonaja modesta* | https://www.inaturalist.org/ | |
| *Pseudonaja nuchalis* | https://www.inaturalist.org/ | https://www.inaturalist.org/observations/68722825 |
| *Pseudonaja textilis* | https://www.inaturalist.org/ | https://www.inaturalist.org/observations/7629423 |
| *Salomonelaps par* | https://www.inaturalist.org/ | |
| *Simoselaps anomalus* | https://www.inaturalist.org/ | |
| *Simoselaps bertholdi* | https://www.inaturalist.org/ | |
| *Simoselaps bimaculatus* | https://www.inaturalist.org/ | |
| *Simoselaps littoralis* | https://www.inaturalist.org/ | |
| *Sinomicrurus hatori* | https://www.inaturalist.org/ | |
| *Sinomicrurus japonicus* | https://www.inaturalist.org/ | |
| *Sinomicrurus kellogg* | https://www.inaturalist.org/ | |
| *Sinomicrurus macclellandi* | https://www.inaturalist.org/ | https://www.inaturalist.org/observations/51575268 |
| *Sinomicrurus sauteri* | https://www.inaturalist.org/ | https://uk.inaturalist.org/observations/152479329 |
| *Suta fasciata* | https://www.inaturalist.org/ | |
| *Suta suta* | https://www.inaturalist.org/ | |
| *Toxicocalamus loriae* | https://www.inaturalist.org/ | |
| *Tropidechis carinatus* | https://www.inaturalist.org/ | |
| *Vermicella annulata* | https://www.inaturalist.org/ | https://www.inaturalist.org/observations/150362446 |
| *Vermicella calonotus* | https://www.inaturalist.org/ | |
| *Vermicella intermedia* | https://www.inaturalist.org/ | |
| *Vermicella multifasciata* | https://www.inaturalist.org/ | |
| *Vermicella snelli* | https://www.inaturalist.org/ | |
| *Vermicella vermiformis* | https://www.inaturalist.org/ | https://inaturalist.ca/observations/7959445 |
| *Walterinnesia aegyptia* | https://www.inaturalist.org/ | |
